# Supplementary material for: Atomistic insights into the hydrodefluorination of PFAS using silylium catalysts
Source: Royal Society of Chemistry journal article supplement (doi:10.1039/d2em00291d), 2022-01-01
Supplement: d2em00291d1.pdf [file d2em00291d1.pdf]

# **Supporting Information:**

## **Atomistic Insights into the Hydrodefluorination of PFAS Using Silylium Catalysts**

Glen R. Jenness,<sup>\*,†</sup> Ashlyn M. Koval,<sup>‡,¶</sup> Brian D. Etz,<sup>‡,¶</sup> and Manoj K. Shukla<sup>\*,†</sup>

<sup>†</sup>*Environmental Laboratory, US Army Engineer Research and Development Center, 3909 Halls  
Ferry Road, Vicksburg, Mississippi 39180, United States*

<sup>‡</sup>*Current: SIMETRI Inc., Winter Park, FL 32792 United States*

<sup>¶</sup>*Oak Ridge Institute for Science and Education (ORISE), Oak Ridge, Tennessee 37830 United  
States*

E-mail: Glen.R.Jenness@usace.army.mil; Manoj.K.Shukla@usace.army.mil

**Table S1: Geometry comparison**

| Bond/Angle<br>(Å/ degrees) | Crystal Structure <sup>a</sup> |        | DFT<br>Structure |
|----------------------------|--------------------------------|--------|------------------|
|                            | A                              | B      |                  |
| Si-Cl                      | 2.30                           | 2.28   | 2.28             |
| B-Cl                       | 1.86                           | 1.86   | 1.90             |
|                            |                                |        |                  |
| B-Cl-Si                    | 115.02                         | 114.35 | 119.51           |
| C-Si-C                     | 119.92                         | 118.06 | 117.43           |
| C-Si-C                     | 111.32                         | 114.85 | 114.43           |
| C-Si-C                     | 114.61                         | 115.15 | 114.88           |
| C-Si-C Ave.                | 115.28                         | 116.02 | 115.58           |

<sup>a</sup> Crystal structure from Douvris, C. *et al.*, *J. Am. Chem. Soc.*, **2010**, 132, 4946–4953

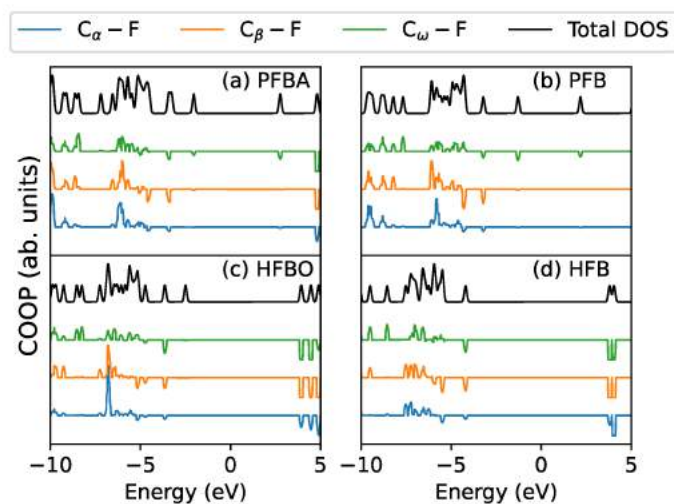

Figure S1: COOP curves for the set of PFAS molecules included in the current study.

**Table S2: Reaction energies for the extraction of a fluorine anion ( $F^-$ ), addition of a hydride ( $H^-$ ), and their sum for the perfluorinated molecules in Figure 2 with respect to C–F position. Units in electron volts (eV).**

| Molecule | Position   | Reaction Energy ( $\Delta E_{\text{rxn}}$ ) |                |       |
|----------|------------|---------------------------------------------|----------------|-------|
|          |            | $F^-$ Extraction                            | $H^-$ Addition | Total |
| PFBA     | $C_\alpha$ | 1.08                                        | −2.62          | −1.54 |
|          | $C_\beta$  | 1.28                                        | −2.92          | −1.64 |
|          | $C_\omega$ | 1.12                                        | −2.37          | −1.24 |
| PFB      | $C_\alpha$ | 0.73                                        | −3.58          | −2.78 |
|          | $C_\beta$  | 0.75                                        | −3.19          | −2.38 |
|          | $C_\omega$ | 0.89                                        | −3.07          | −2.18 |
| HFBO     | $C_\alpha$ | 0.94                                        | −2.22          | −1.28 |
|          | $C_\beta$  | 1.15                                        | −2.73          | −1.58 |
|          | $C_\omega$ | 0.94                                        | −3.10          | −2.15 |
| HFB      | $C_\alpha$ | 0.72                                        | −2.10          | −1.38 |
|          | $C_\beta$  | 1.09                                        | −2.65          | −1.56 |
|          | $C_\omega$ | 0.97                                        | −3.00          | −2.03 |

**Table S3: Reaction energetics for the extraction of a fluorine anion ( $F^-$ ) and the addition of a hydride ( $H^-$ ) in a concerted reaction mechanism for the perfluorinated molecules in Figure 2 with respect to C–F position. Units in electron volts (eV).**

| Molecule | Position   | Activation Energy ( $E_a$ ) | Reaction Energy ( $\Delta E_{\text{rxn}}$ ) |
|----------|------------|-----------------------------|---------------------------------------------|
| PFBA     | $C_\alpha$ | 0.63                        | −3.21                                       |
|          | $C_\beta$  | 0.49                        | −2.99                                       |
|          | $C_\omega$ | 0.15                        | −1.93                                       |
| PFB      | $C_\alpha$ | 0.64                        | −3.14                                       |
|          | $C_\beta$  | 0.42                        | −3.33                                       |
|          | $C_\omega$ | 0.09                        | −1.92                                       |
| HFBO     | $C_\alpha$ | 0.81                        | −3.02                                       |
|          | $C_\beta$  | 0.66                        | −3.20                                       |
|          | $C_\omega$ | 0.31                        | −1.93                                       |
| HFB      | $C_\alpha$ | 0.78                        | −1.45                                       |
|          | $C_\beta$  | 0.76                        | −2.38                                       |
|          | $C_\omega$ | 0.41                        | −1.63                                       |

**Table S4: Change in reaction energies due to the presence of the carborane anion ( $[\text{HCB}_{11}\text{H}_5\text{F}_6]^-$ ) for the extraction of a fluorine anion ( $\text{F}^-$ ), addition of a hydride ( $\text{H}^-$ ), and their sum for the perfluorinated molecules in Figure 2 with respect to C–F position. Units in electron volts (eV).**

| Molecule | Position          | Change in Reaction Energy ( $\Delta\Delta E_{\text{rxn}}$ ) |                       |       |
|----------|-------------------|-------------------------------------------------------------|-----------------------|-------|
|          |                   | $\text{F}^-$ Extraction                                     | $\text{H}^-$ Addition | Total |
| PFBA     | $\text{C}_\alpha$ | −0.40                                                       | −1.17                 | −1.57 |
|          | $\text{C}_\beta$  | −0.33                                                       | −0.57                 | −1.90 |
|          | $\text{C}_\omega$ | −0.18                                                       | +0.46                 | +0.28 |
| PFB      | $\text{C}_\alpha$ | −0.60                                                       | +0.41                 | −0.19 |
|          | $\text{C}_\beta$  | +0.09                                                       | +0.63                 | +0.72 |
|          | $\text{C}_\omega$ | −0.23                                                       | +0.08                 | −0.15 |
| HFBO     | $\text{C}_\alpha$ | −1.06                                                       | −1.74                 | −2.80 |
|          | $\text{C}_\beta$  | −0.22                                                       | −1.74                 | −1.96 |
|          | $\text{C}_\omega$ | +0.03                                                       | +0.28                 | +0.31 |
| HFB      | $\text{C}_\alpha$ | −0.13                                                       | −0.37                 | −0.50 |
|          | $\text{C}_\beta$  | −0.18                                                       | −1.54                 | −1.72 |
|          | $\text{C}_\omega$ | +0.01                                                       | +0.00                 | +0.01 |

**Table S5: Change in reaction energetics for the concerted reaction mechanism for the perfluorinated molecules in Figure 2 with respect to C–F position in the presence of a carborane anion ( $[\text{HCB}_{11}\text{H}_5\text{F}_6]^-$ ). Units in electron volts (eV).**

| Molecule | Position          | Change in Activation Energy ( $\Delta E_a$ ) | Change in Reaction Energy ( $\Delta\Delta E_{\text{rxn}}$ ) |
|----------|-------------------|----------------------------------------------|-------------------------------------------------------------|
| PFBA     | $\text{C}_\alpha$ | −0.54                                        | +2.08                                                       |
|          | $\text{C}_\beta$  | +0.03                                        | +0.50                                                       |
|          | $\text{C}_\omega$ | +0.90                                        | −0.11                                                       |
| PFB      | $\text{C}_\alpha$ | −0.59                                        | +0.10                                                       |
|          | $\text{C}_\beta$  | +0.06                                        | +0.14                                                       |
|          | $\text{C}_\omega$ | +0.78                                        | −0.20                                                       |
| HFBO     | $\text{C}_\alpha$ | −0.27                                        | +0.58                                                       |
|          | $\text{C}_\beta$  | −0.42                                        | +0.26                                                       |
|          | $\text{C}_\omega$ | +0.73                                        | −0.15                                                       |
| HFB      | $\text{C}_\alpha$ | +0.09                                        | −0.50                                                       |
|          | $\text{C}_\beta$  | +0.30                                        | −0.38                                                       |
|          | $\text{C}_\omega$ | +0.79                                        | −0.43                                                       |

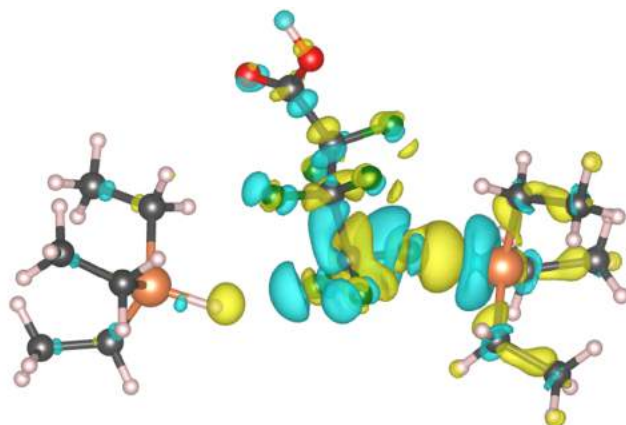

Figure S2: Charge density differences for PFBA at the  $C_{\omega}$  position interacting with a  $\text{Et}_3\text{Si}^+$  and  $\text{Et}_3\text{SiH}$ . Blue regions denote areas of charge depletion, whilst yellow denotes areas of charge accumulation.

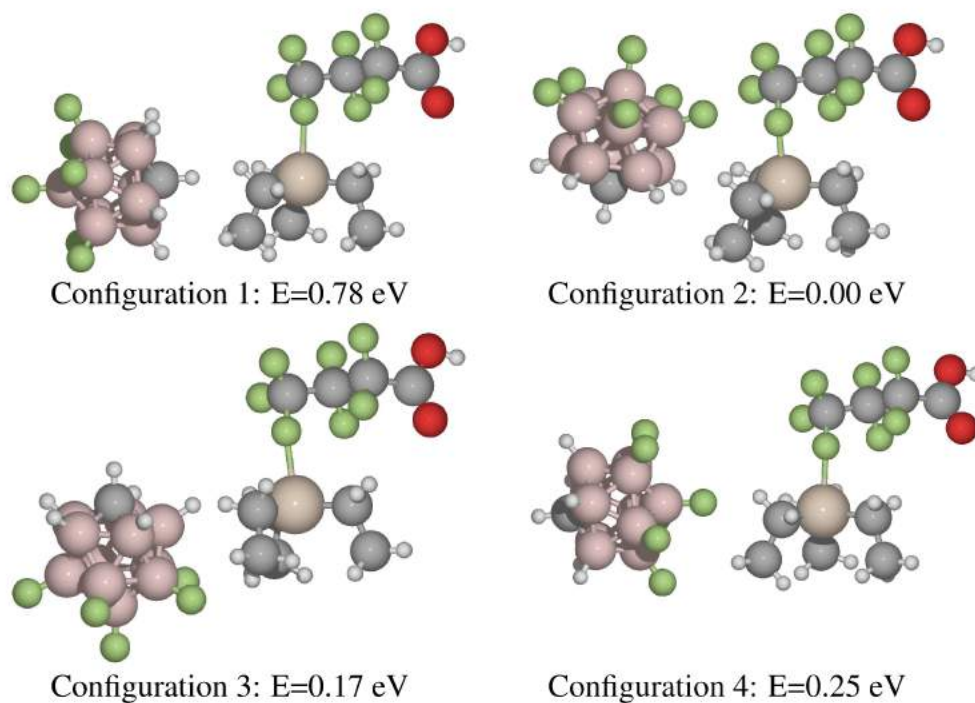

Figure S3: Orientation of the carborane anion relative to PFBA and a silylium cation with relative energies given with respect to the lowest energy conformer (configuration 1).

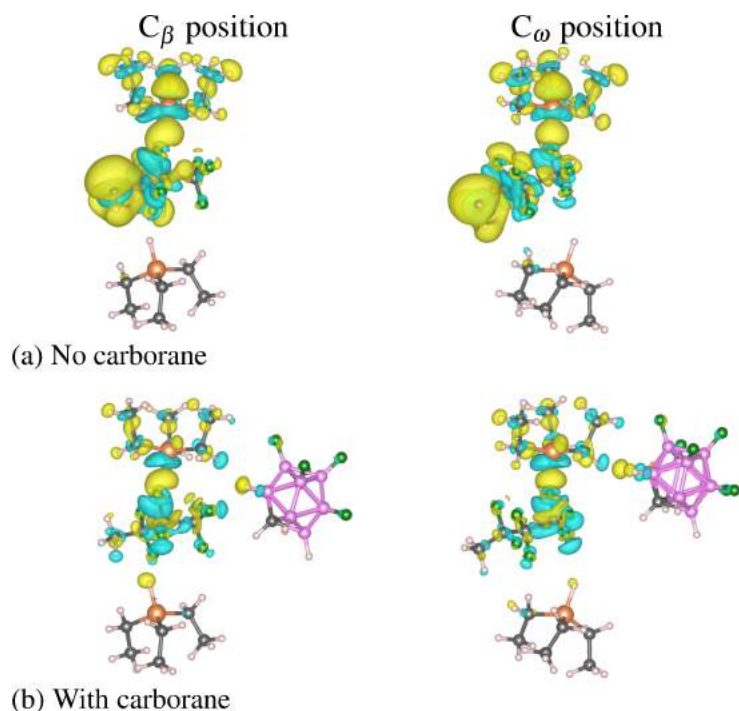

Figure S4: Charge density differences for HFB in the (a) absence of carborane and (b) with it present interacting with a  $\text{Et}_3\text{Si}^+$  and  $\text{Et}_3\text{SiH}$ . Blue regions denote areas of charge depletion, whilst yellow denotes areas of charge accumulation. Results shown are for the  $0.01 \text{ e}^- \text{ \AA}^{-3}$  isosurface.

**Table S6: Change in reaction energetics for the concerted reaction mechanism for the per-fluorinated molecules in Figure 2 with respect to C–F position in the presence of different carborane anions ( $[\text{HCB}_{11}\text{H}_5\text{X}_6]^-$ , where  $\text{X}=\{\text{Cl}, \text{Br}, \text{I}\}$ ). Reference is  $[\text{HCB}_{11}\text{H}_5\text{F}_6]^-$ . Units in electron volts (eV).**

| Molecule | Position       | $[\text{HCB}_{11}\text{H}_5\text{Cl}_6]^-$ |                               | $[\text{HCB}_{11}\text{H}_5\text{Br}_6]^-$ |                               | $[\text{HCB}_{11}\text{H}_5\text{I}_6]^-$ |                               |
|----------|----------------|--------------------------------------------|-------------------------------|--------------------------------------------|-------------------------------|-------------------------------------------|-------------------------------|
|          |                | $\Delta E_a$                               | $\Delta\Delta E_{\text{rxn}}$ | $\Delta E_a$                               | $\Delta\Delta E_{\text{rxn}}$ | $\Delta E_a$                              | $\Delta\Delta E_{\text{rxn}}$ |
| PFBA     | C <sub>α</sub> | +0.00                                      | −0.17                         | +0.02                                      | −0.21                         | +0.00                                     | −0.09                         |
|          | C <sub>β</sub> | +0.12                                      | −0.02                         | −0.05                                      | −0.09                         | −0.38                                     | −0.15                         |
|          | C <sub>ω</sub> | −0.18                                      | −0.04                         | +0.09                                      | −0.18                         | −0.38                                     | −0.60                         |
| PFB      | C <sub>α</sub> | −0.09                                      | +0.63                         | −0.05                                      | +0.69                         | −0.03                                     | +1.00                         |
|          | C <sub>β</sub> | +0.02                                      | +0.01                         | −0.03                                      | +0.01                         | −0.24                                     | −0.14                         |
|          | C <sub>ω</sub> | +0.21                                      | +0.32                         | +0.07                                      | −0.12                         | −0.33                                     | −0.68                         |
| HFBO     | C <sub>α</sub> | +0.06                                      | −0.10                         | −0.03                                      | −0.15                         | −0.48                                     | +0.67                         |
|          | C <sub>β</sub> | +0.11                                      | −0.06                         | +0.13                                      | +0.06                         | −0.20                                     | +0.03                         |
|          | C <sub>ω</sub> | −0.19                                      | −0.14                         | −0.19                                      | −0.20                         | −0.34                                     | −0.66                         |
| HFB      | C <sub>α</sub> | −0.08                                      | +0.01                         | +0.12                                      | −0.11                         | −0.80                                     | +0.01                         |
|          | C <sub>β</sub> | −0.38                                      | −0.01                         | −0.48                                      | +0.00                         | +0.12                                     | −0.30                         |
|          | C <sub>ω</sub> | −0.29                                      | −0.05                         | −0.15                                      | −0.10                         | −0.31                                     | −0.49                         |

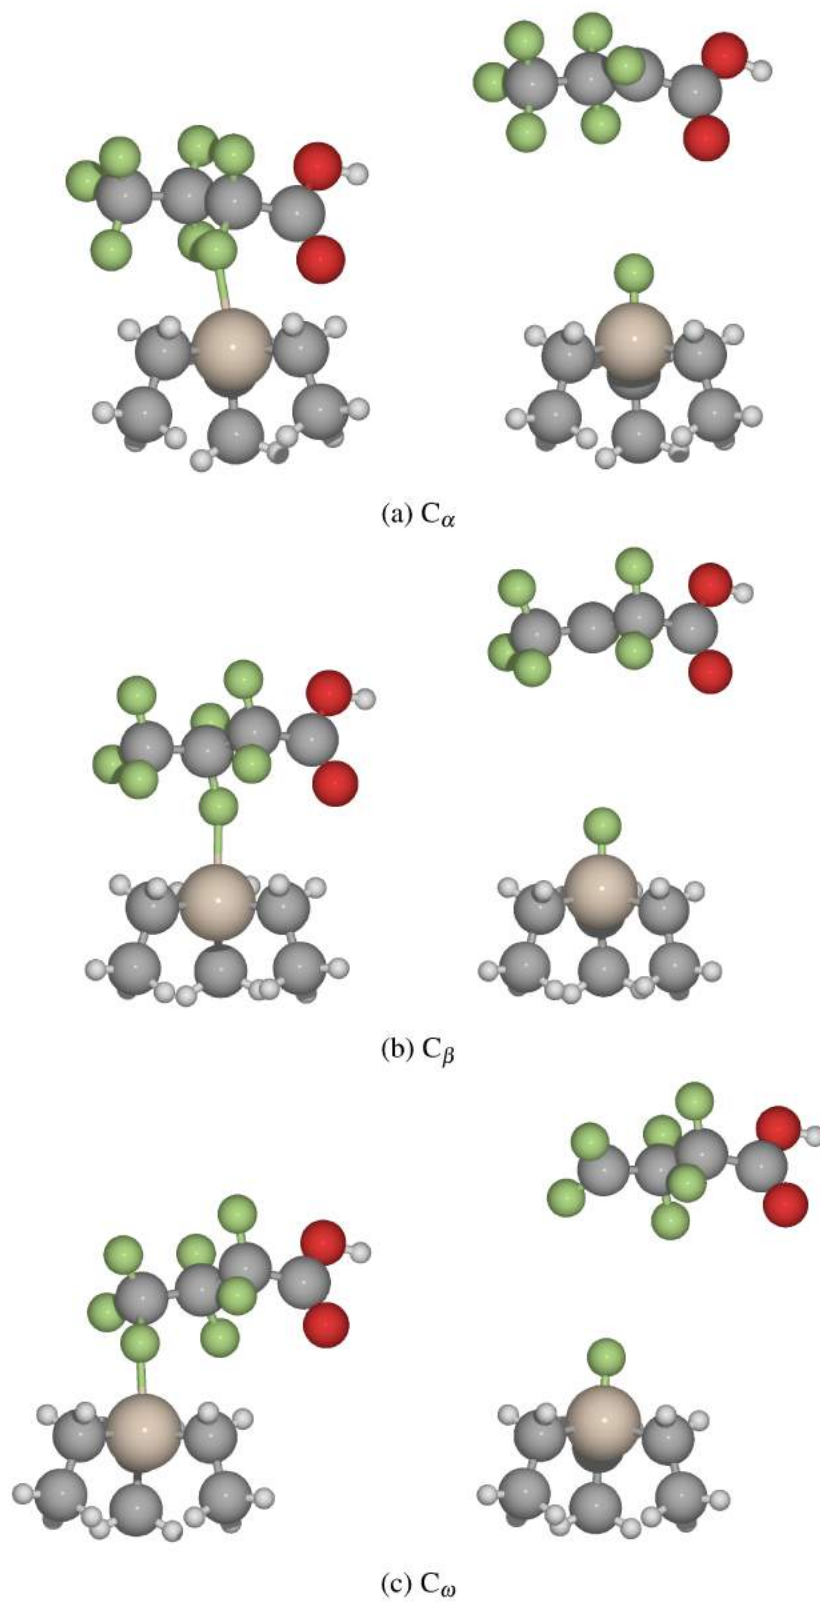

Figure S5: Initial and final states of carbocation formation/defluorination as a function of position for PFBA.

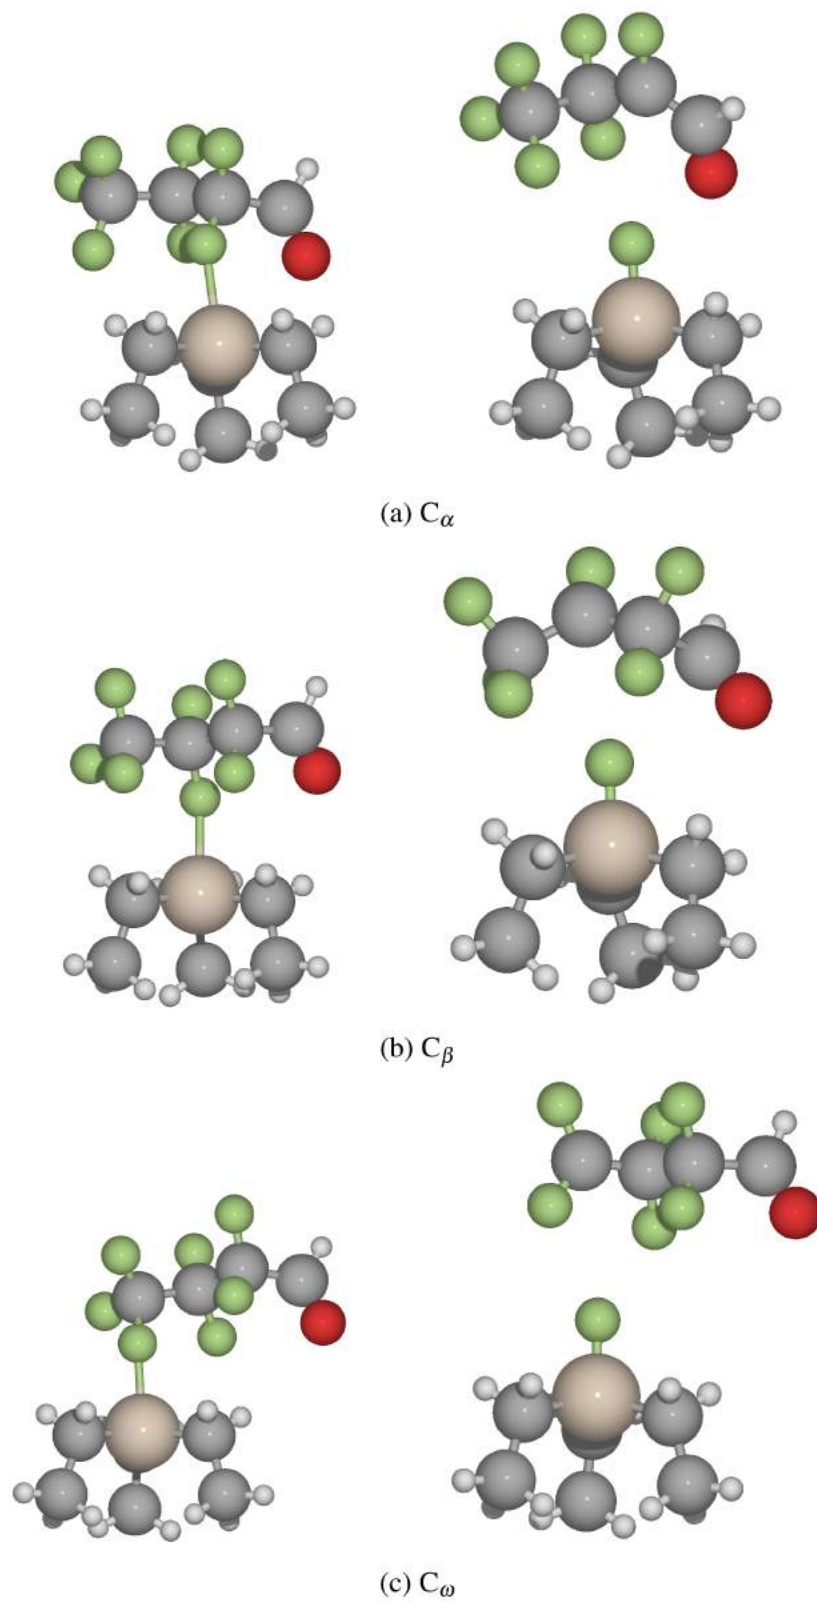

Figure S6: Initial and final states of carbocation formation/defluorination as a function of position for PFB.

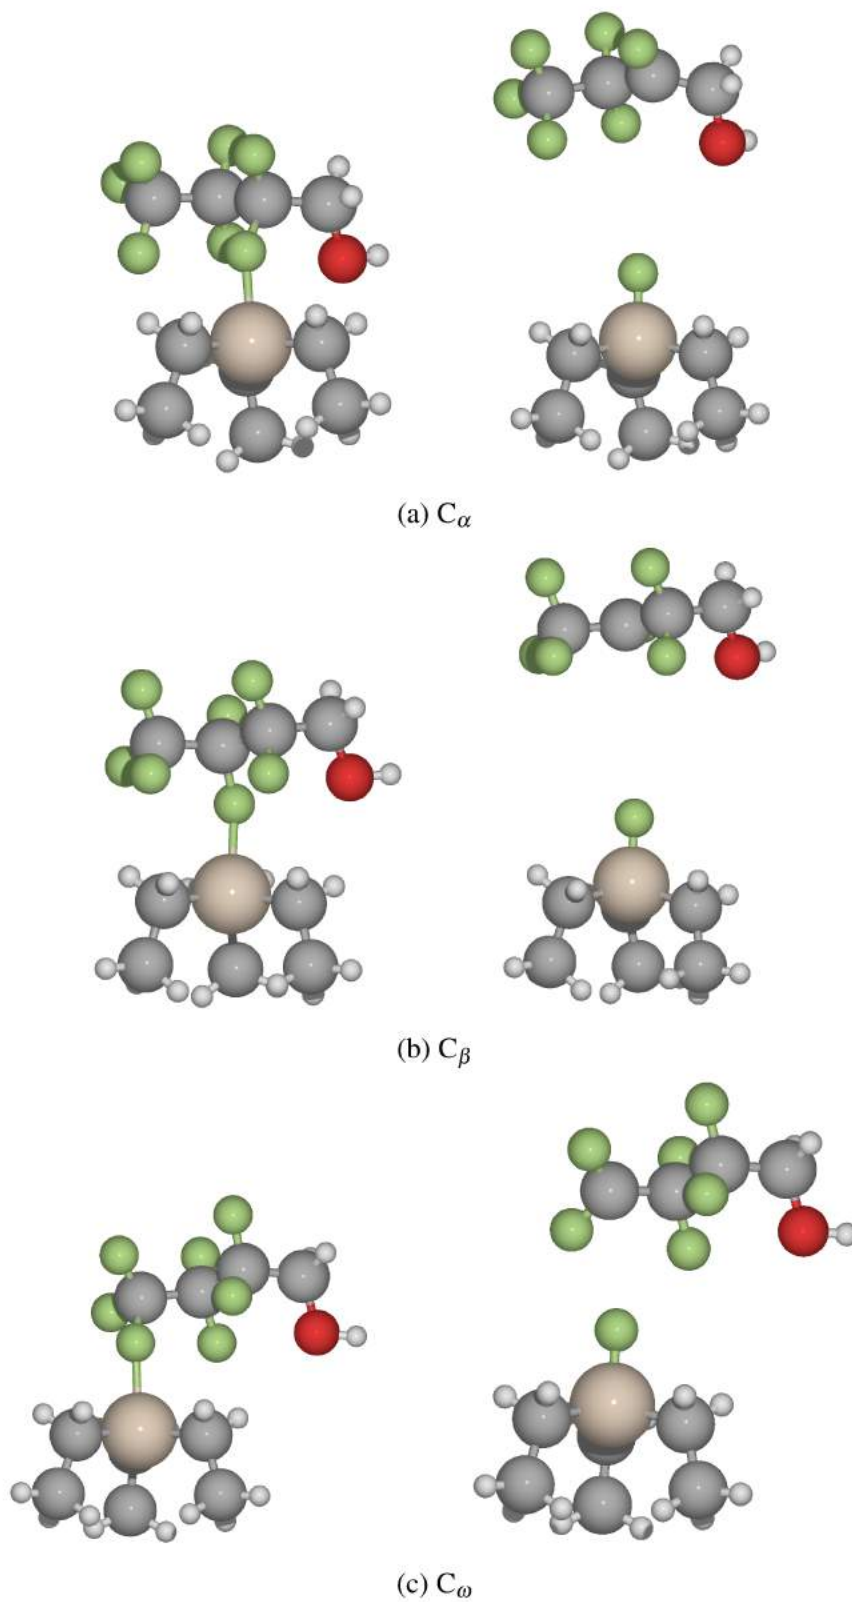

Figure S7: Initial and final states of carbocation formation/defluorination as a function of position for HFBO.

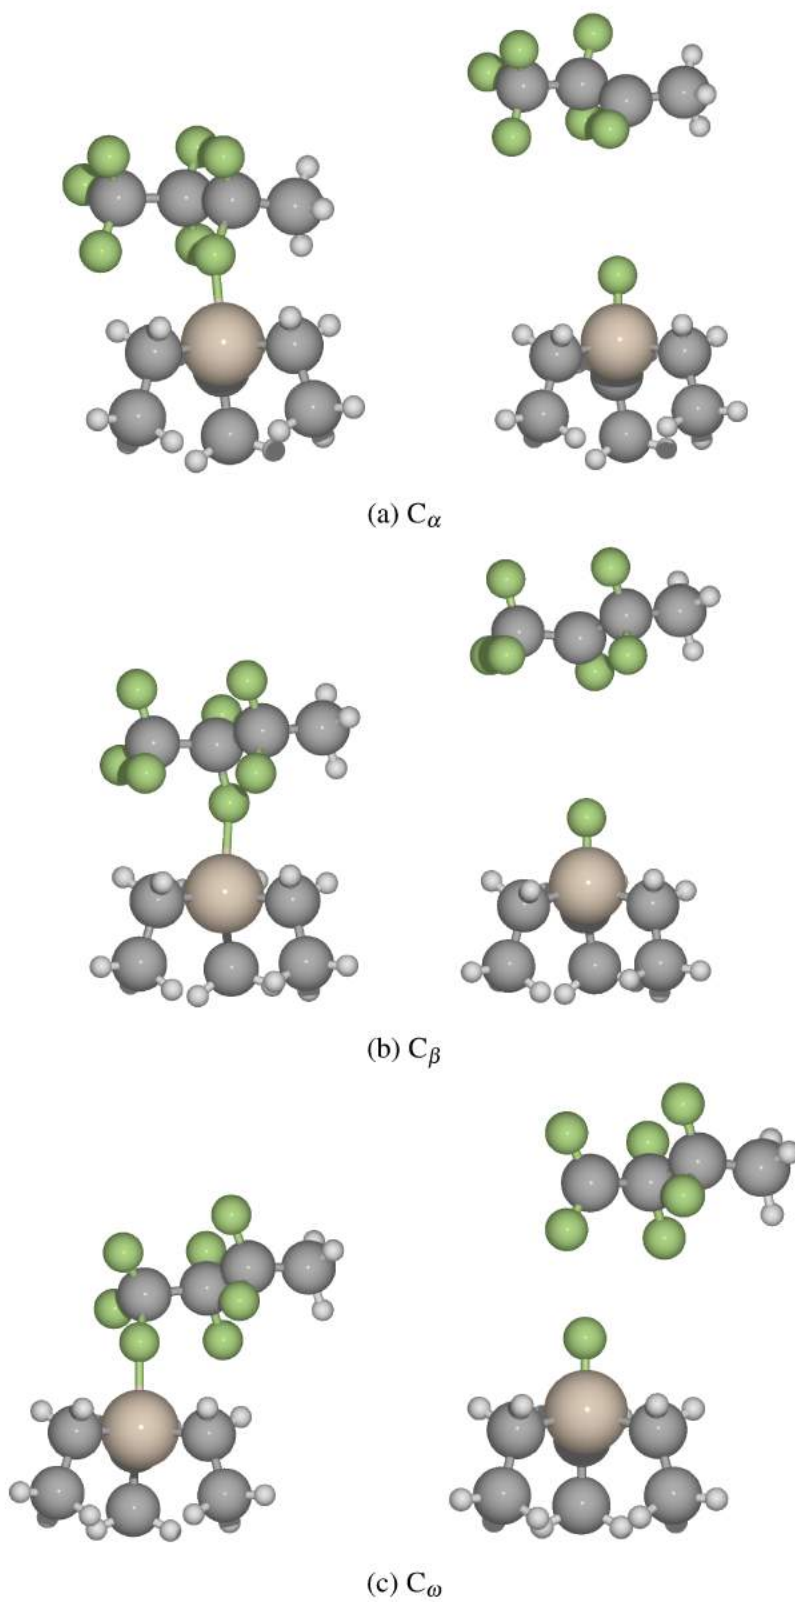

Figure S8: Initial and final states of carbocation formation/defluorination as a function of position for HFB.

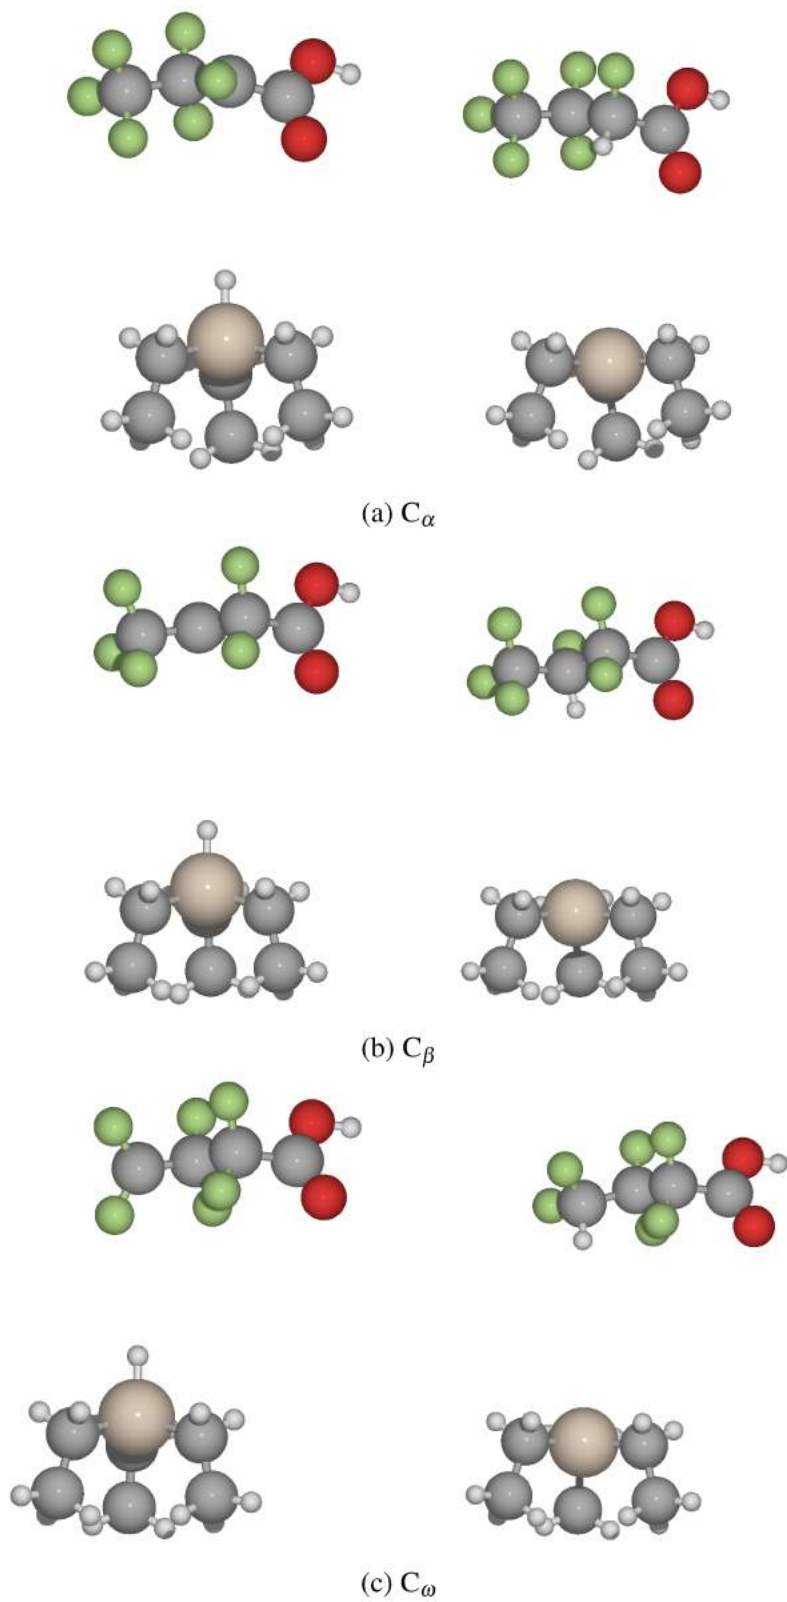

Figure S9: Initial and final states of the hydride addition reaction of the carbocation as a function of position for PFBA.

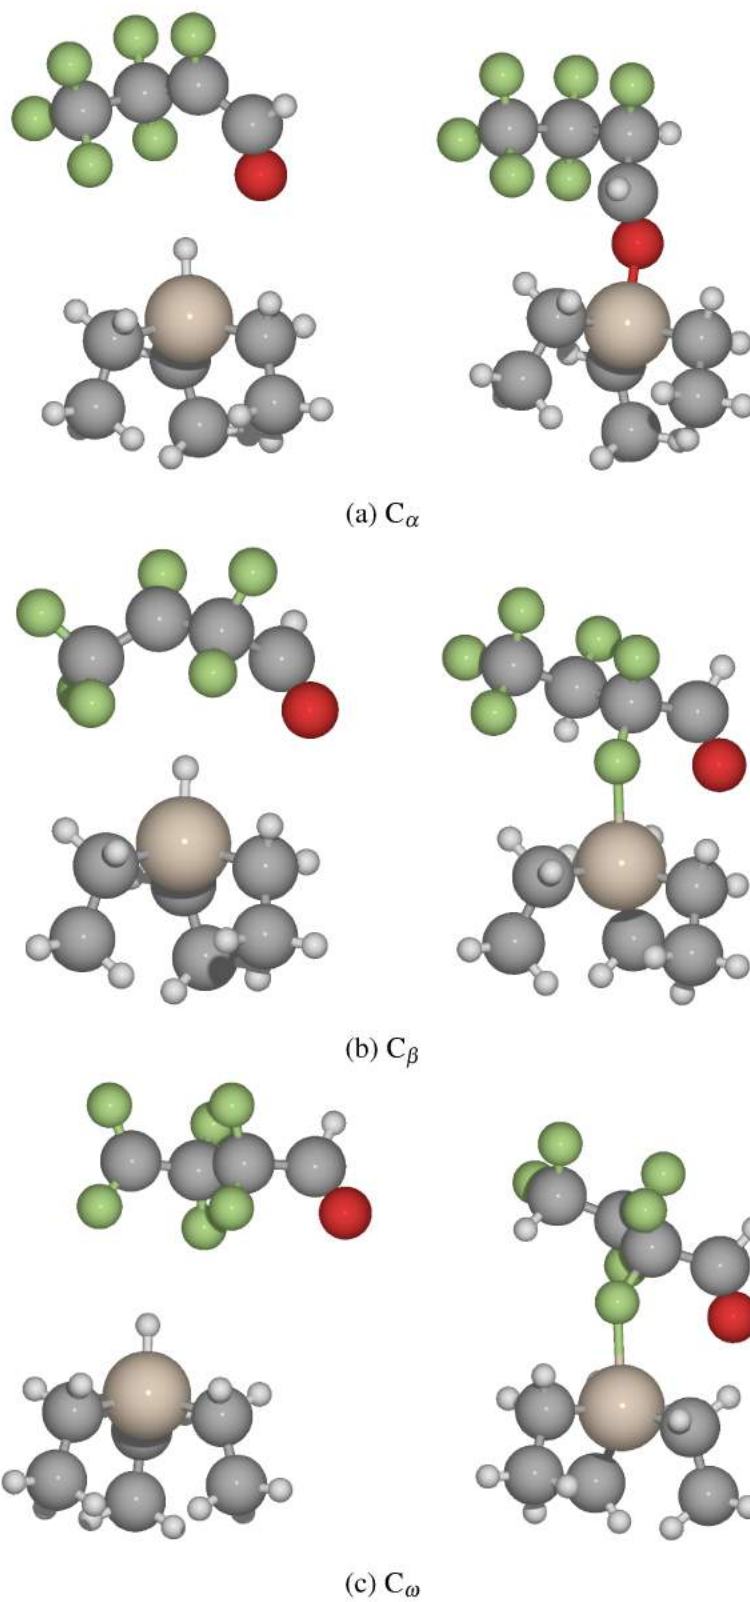

Figure S10: Initial and final states of the hydride addition reaction of the carbocation as a function of position for PFB.

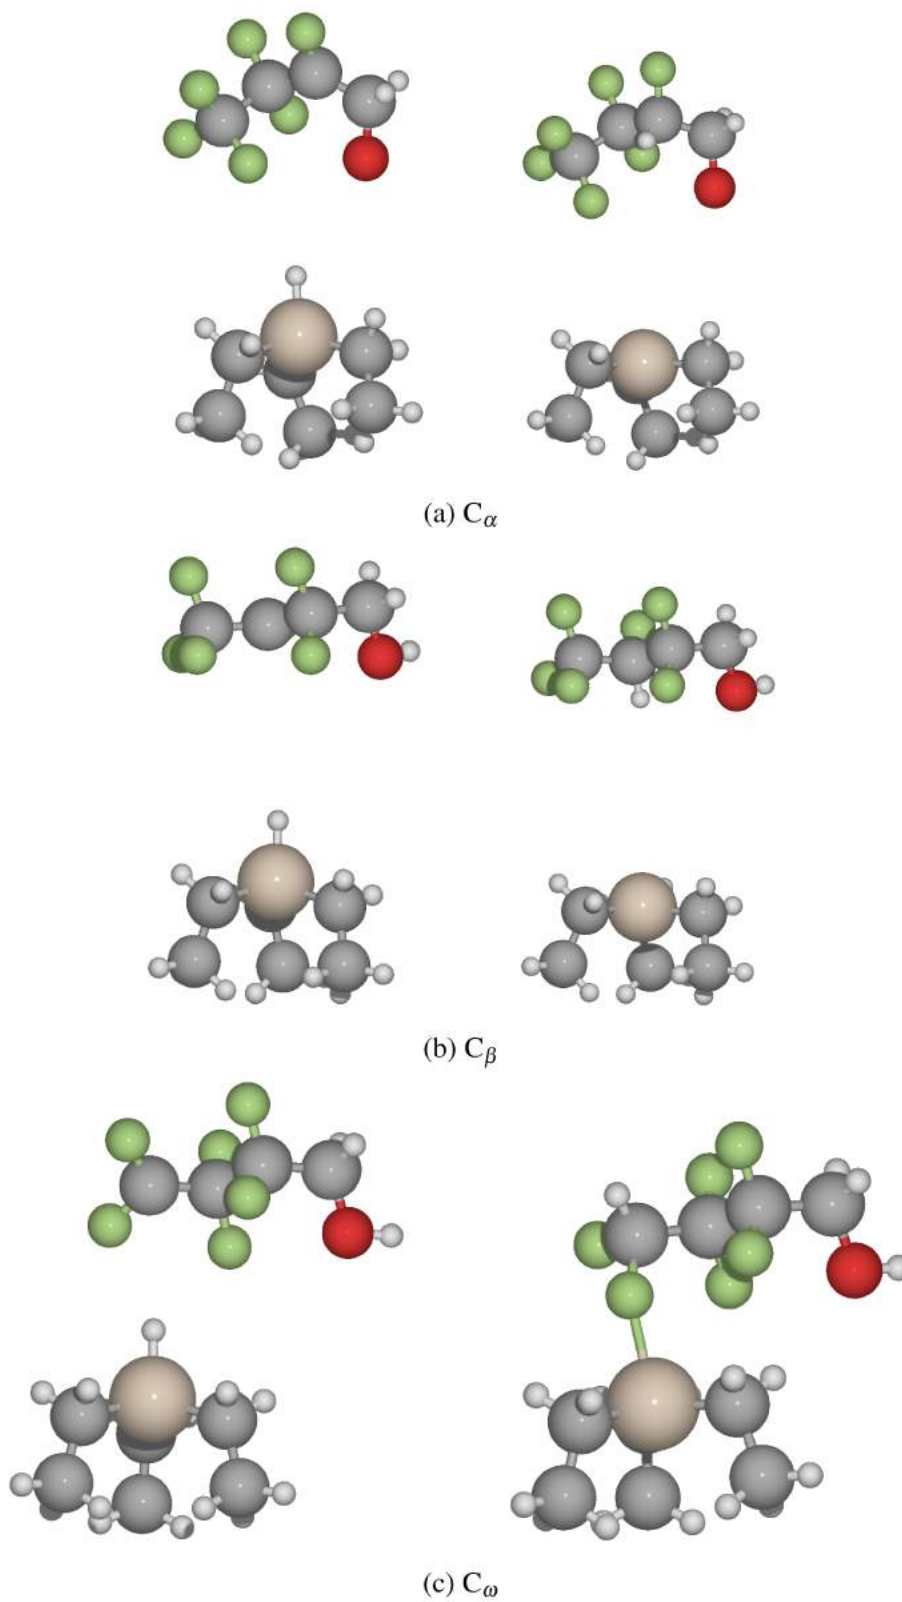

Figure S11: Initial and final states of the hydride addition reaction of the carbocation as a function of position for HFBO.

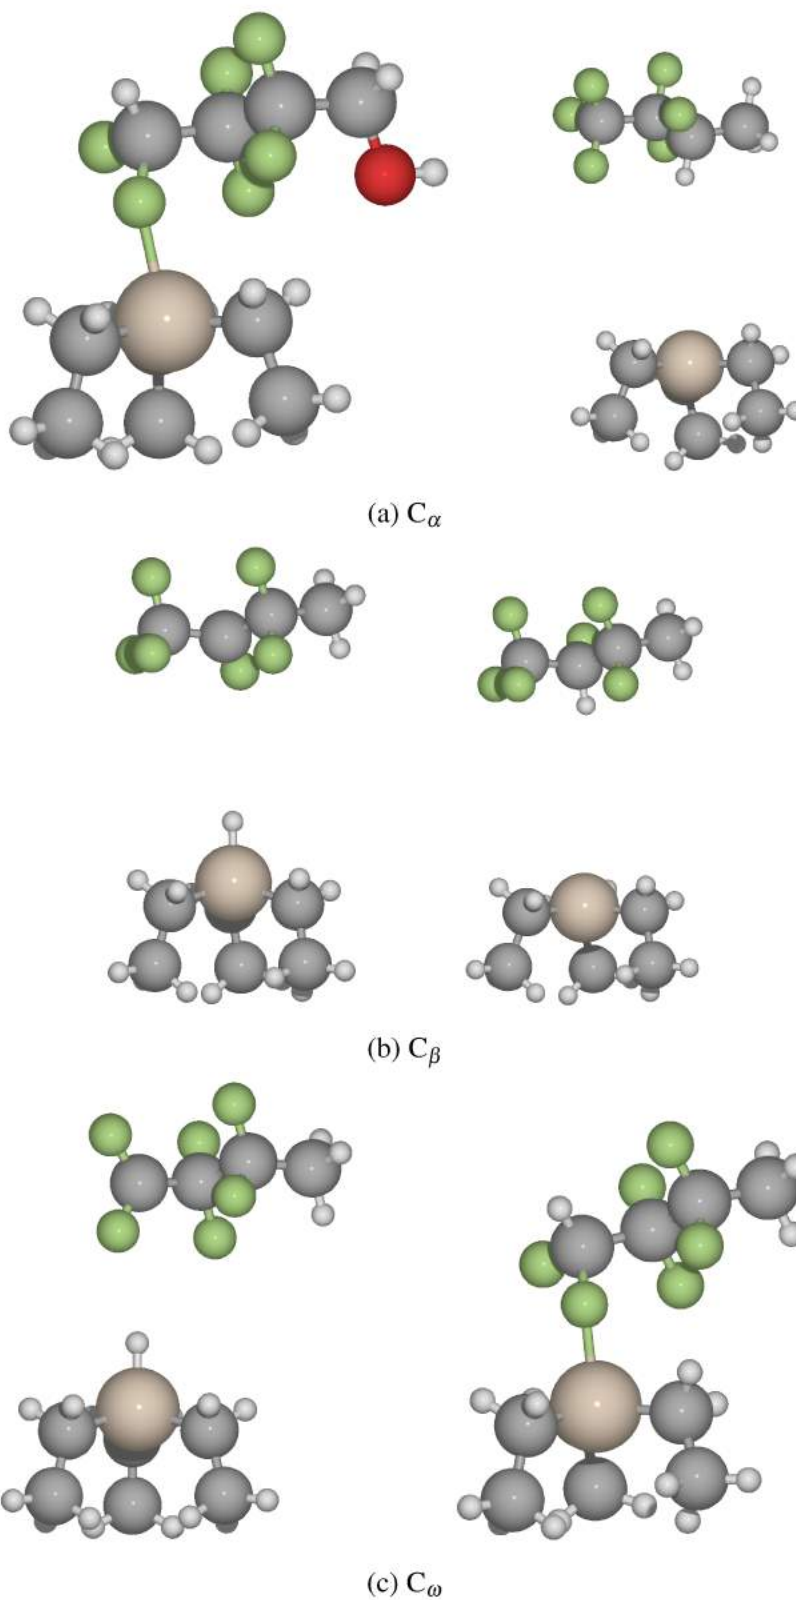

Figure S12: Initial and final states of the hydride addition reaction of the carbocation as a function of position for HFB.

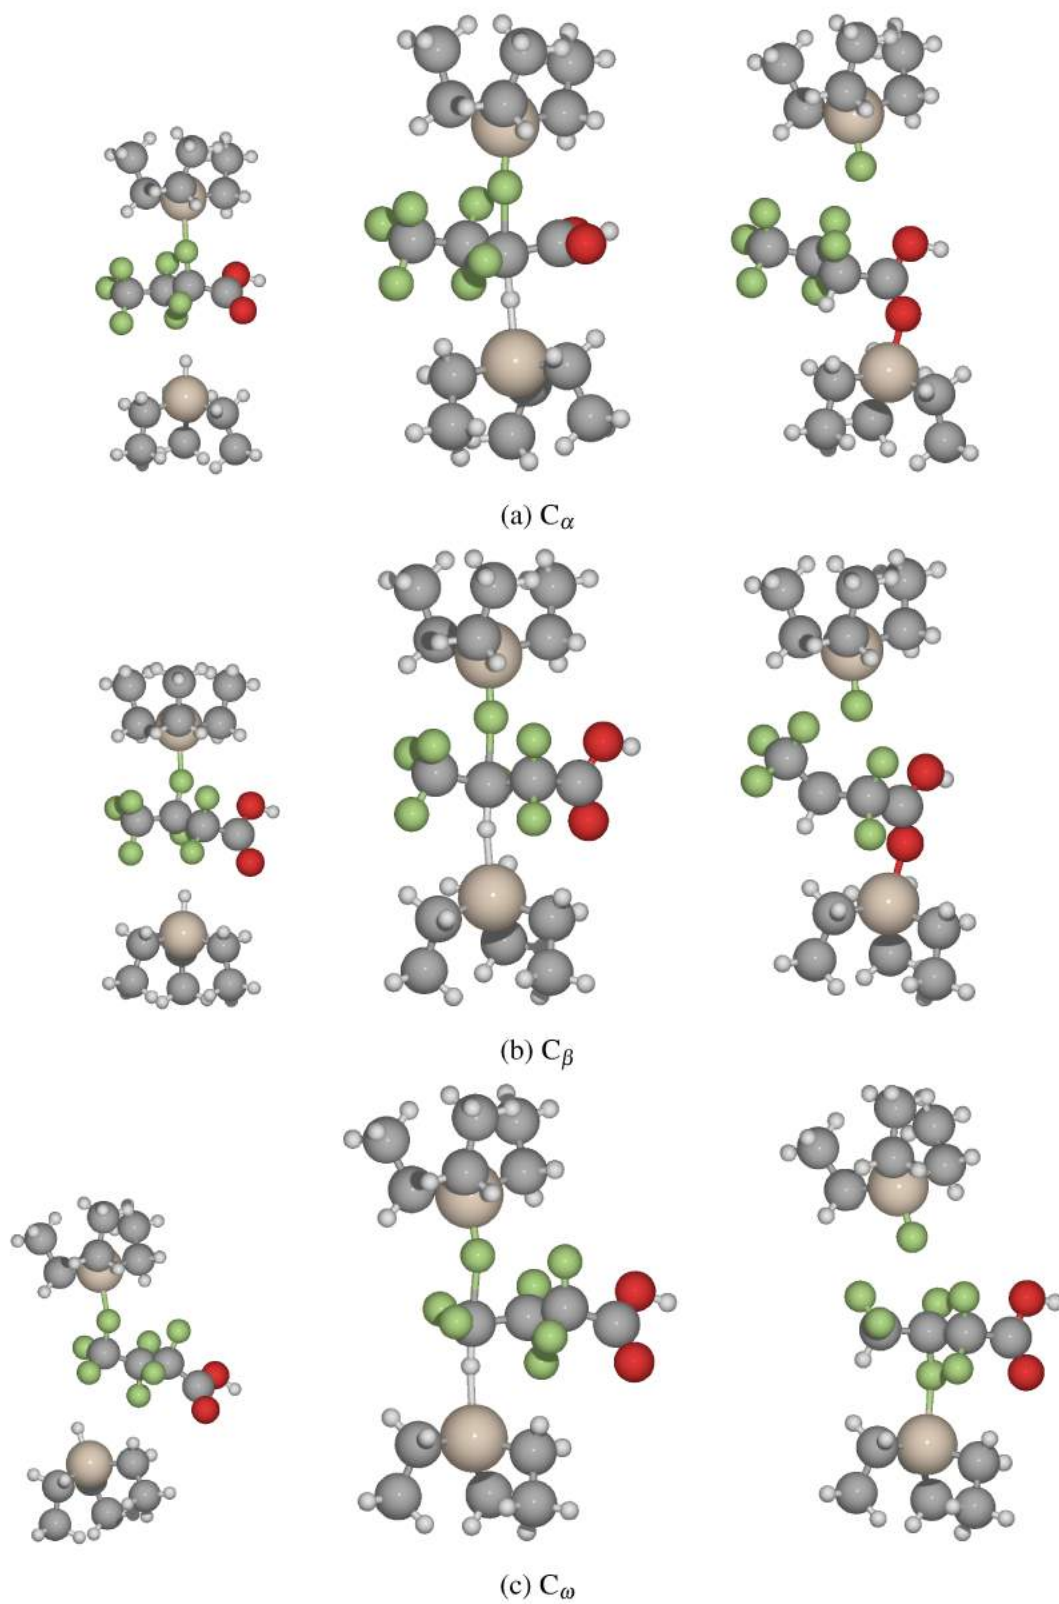

Figure S13: Initial, transition, and final states of the concerted defluorination/hydride addition reaction as a function of position for PFBA.

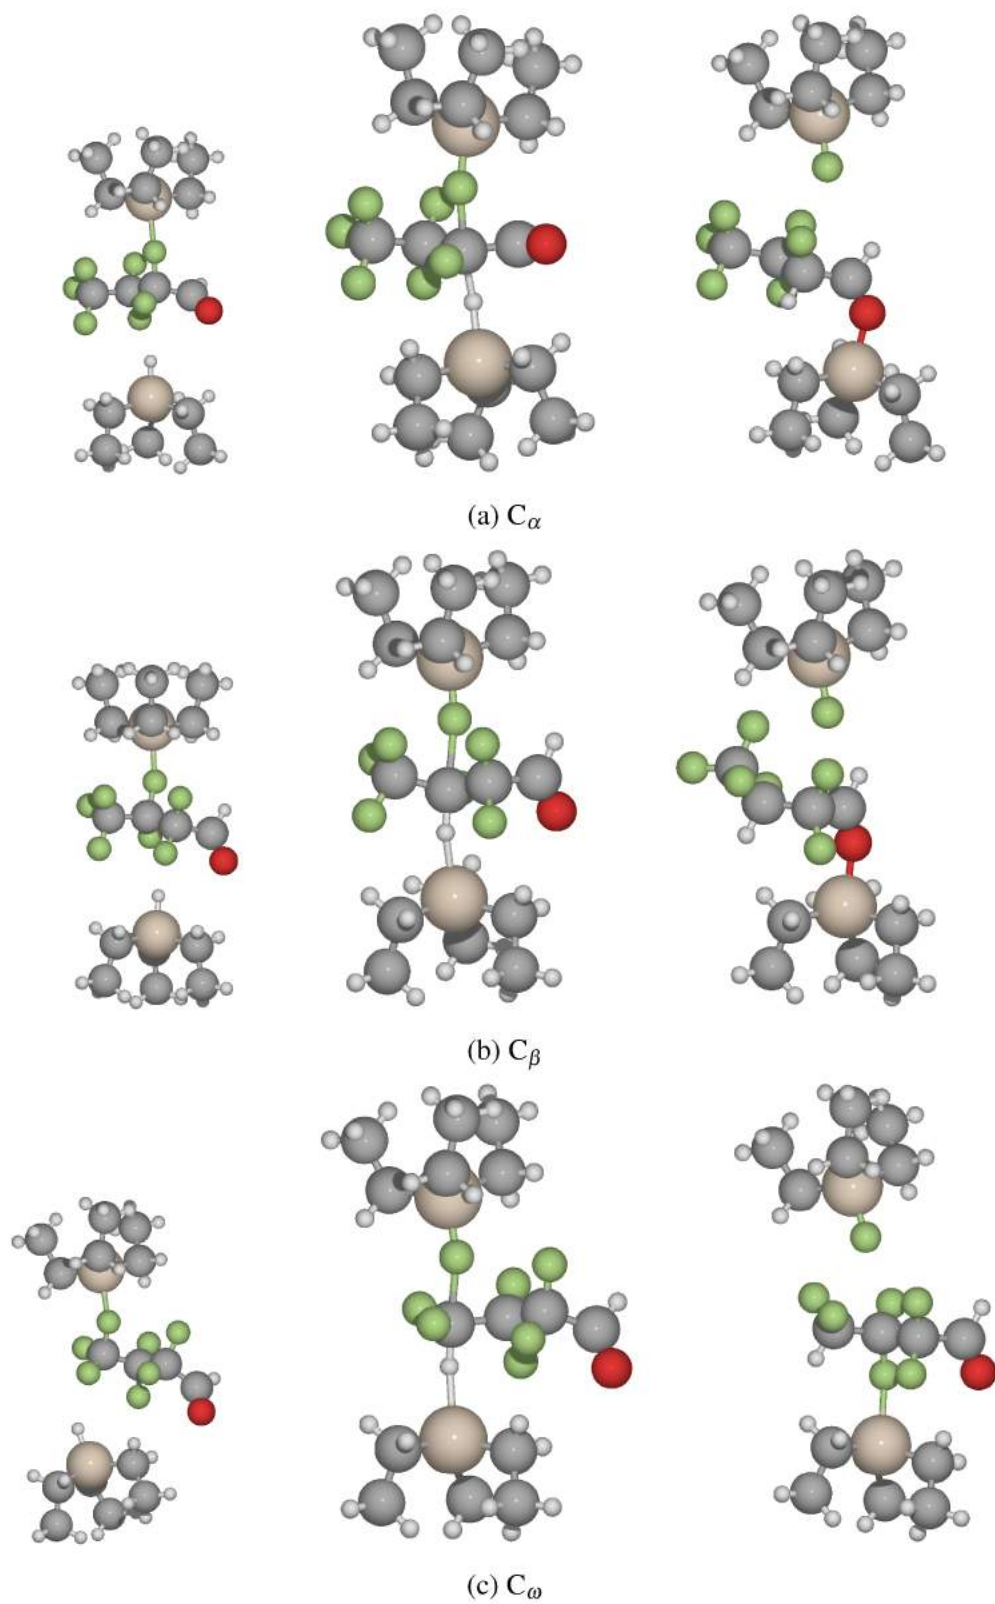

Figure S14: Initial, transition, and final states of the concerted defluorination/hydride addition reaction as a function of position for PFB.

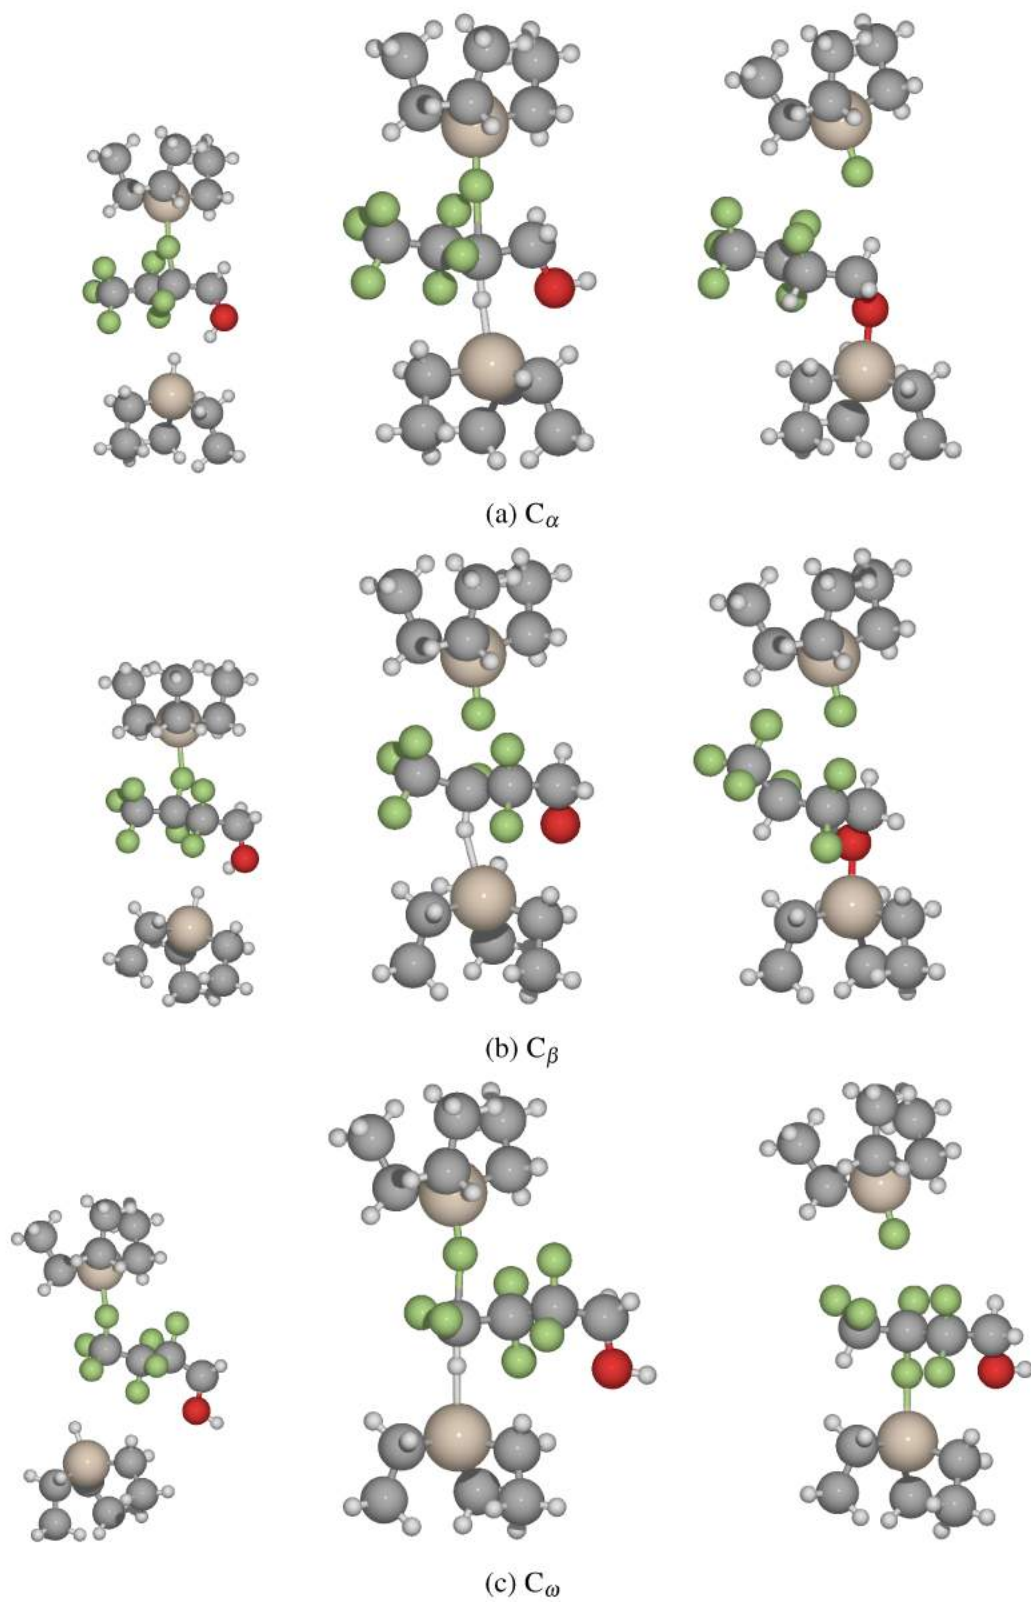

Figure S15: Initial, transition, and final states of the concerted defluorination/hydride addition reaction as a function of position for HFBO.

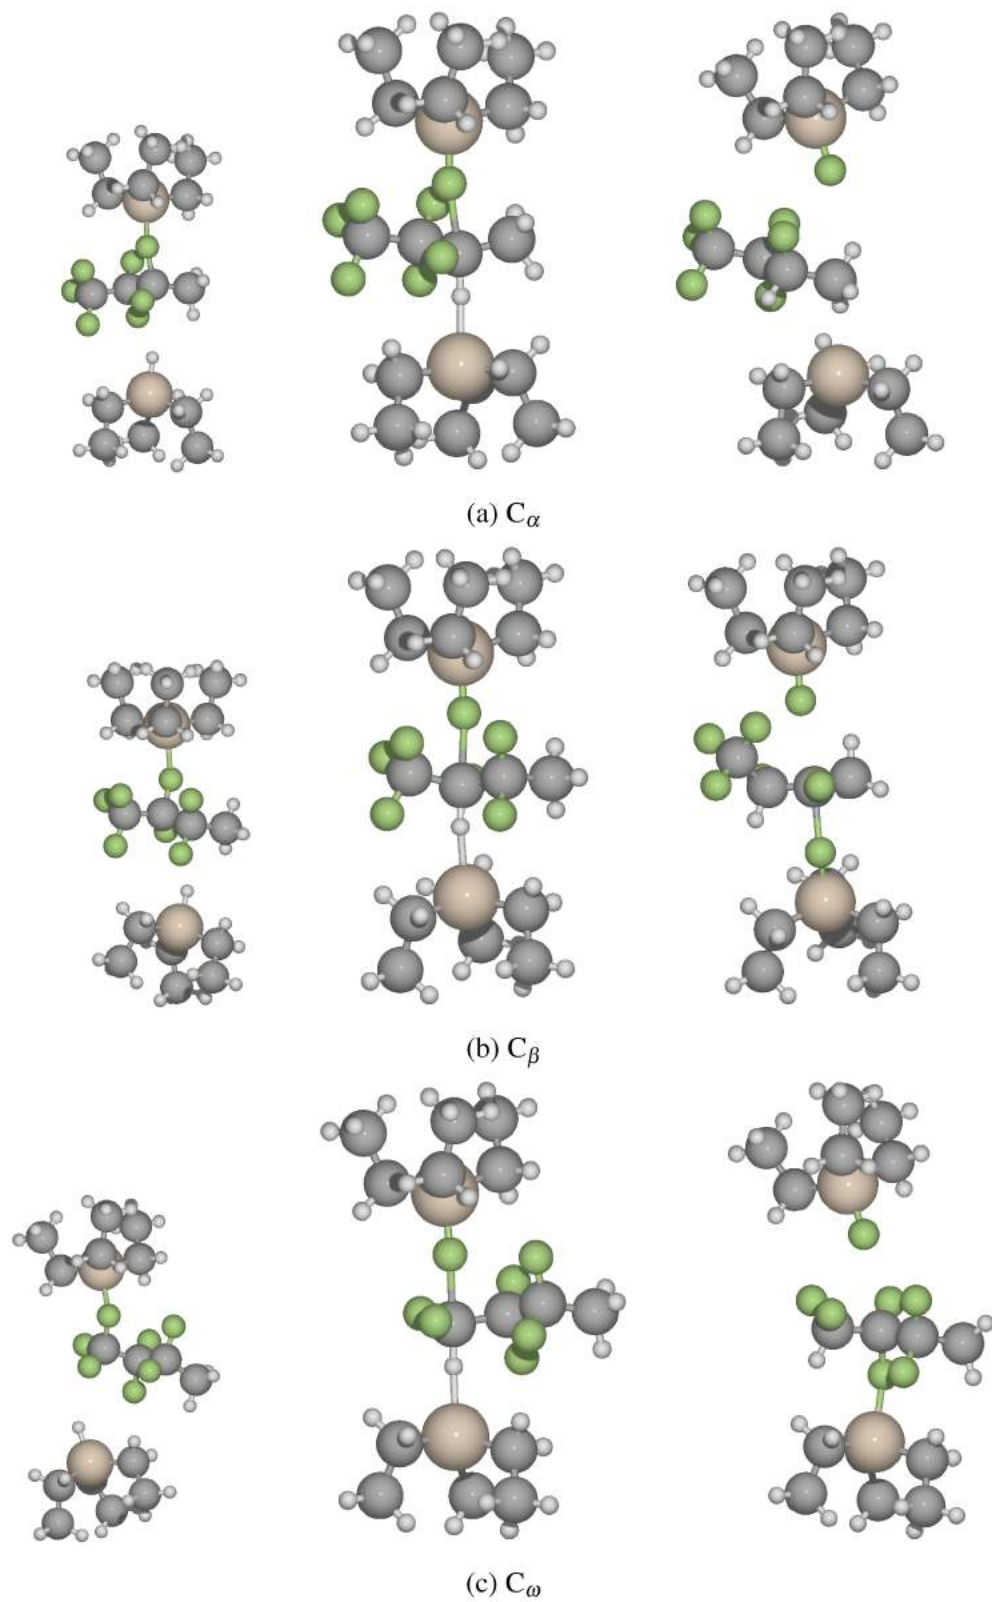

Figure S16: Initial, transition, and final states of the concerted defluorination/hydride addition reaction as a function of position for HFB.

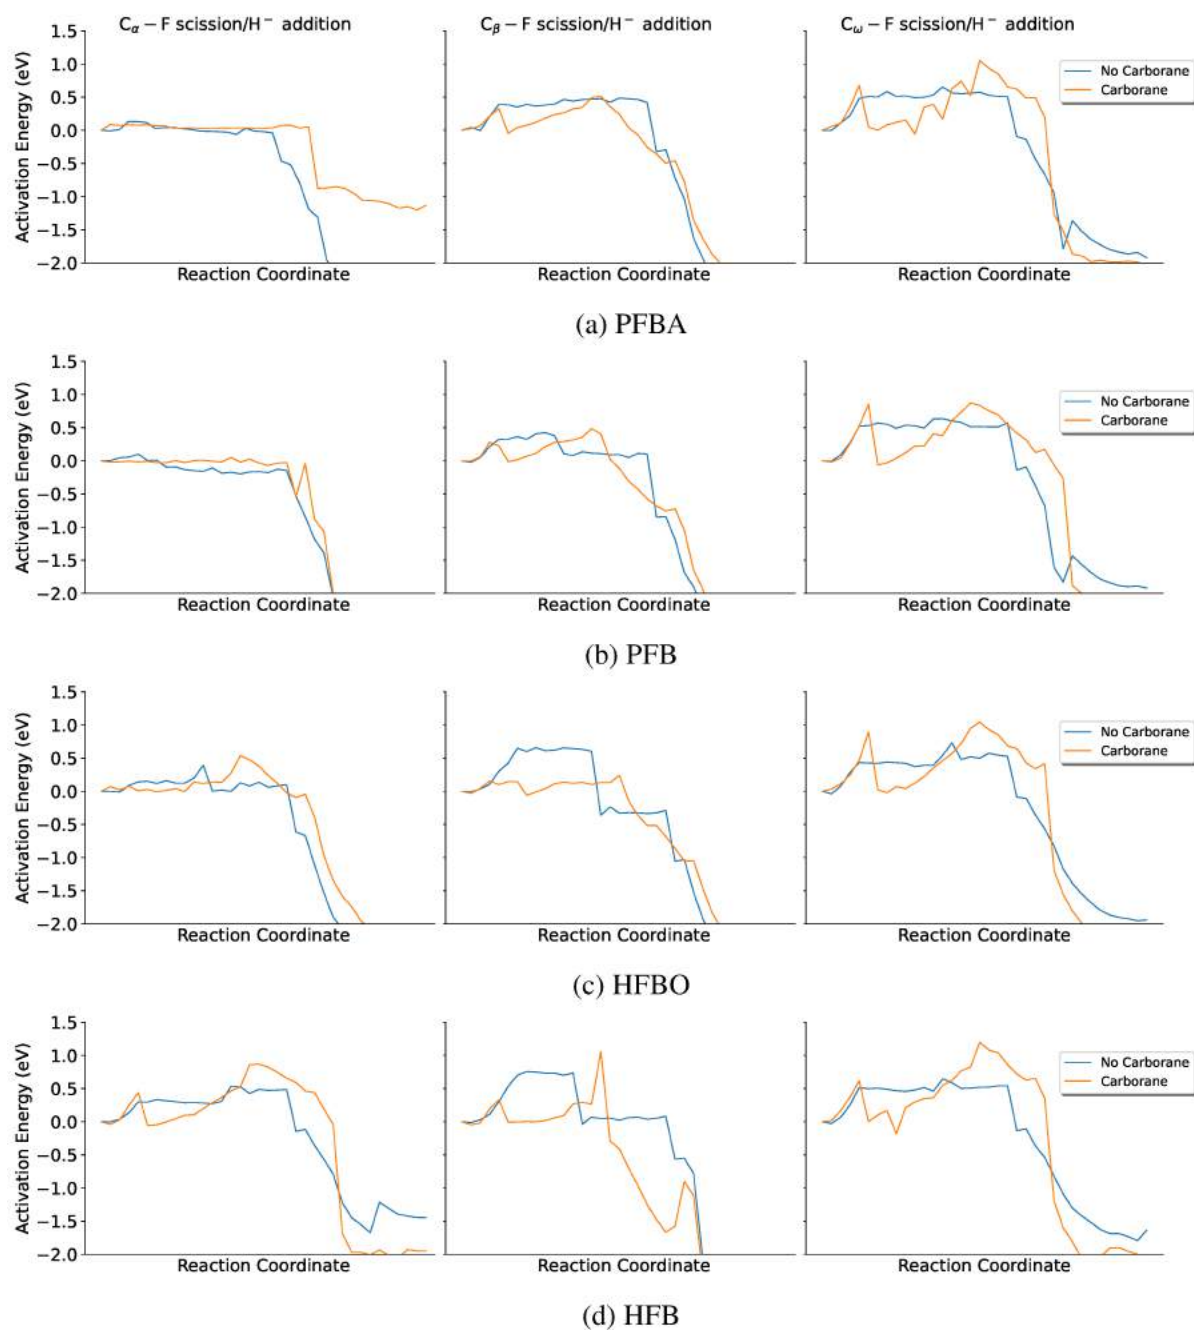

Figure S17: Reaction pathways for the four per-fluorinated molecules in the current study as a function of carbon position and in the presence/absence of carborane ( $[\text{HCB}_{11}\text{H}_5\text{F}_6]^-$ ).

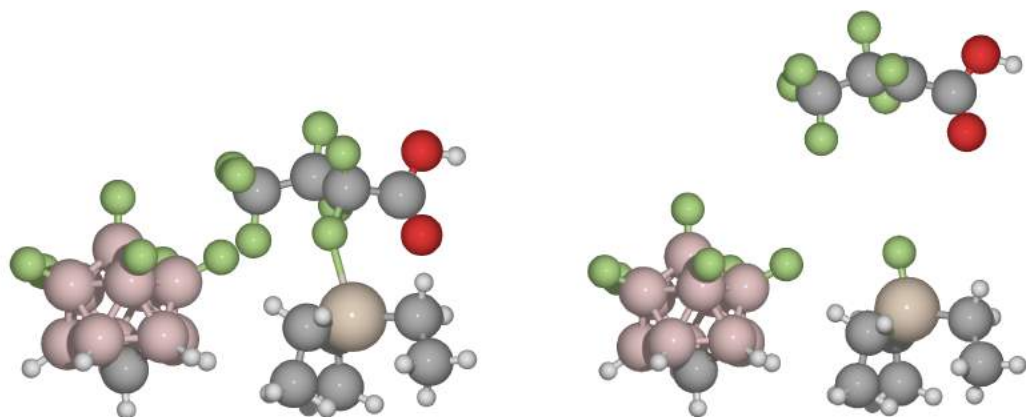

(a) C $\alpha$

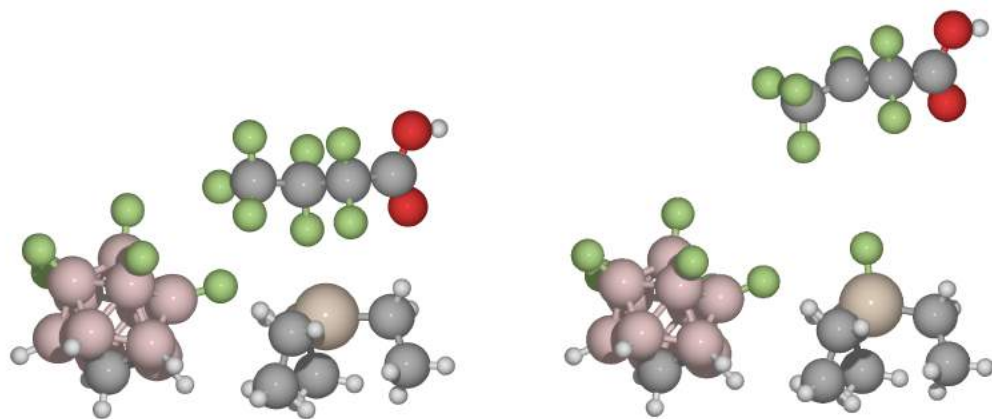

(b) C $\beta$

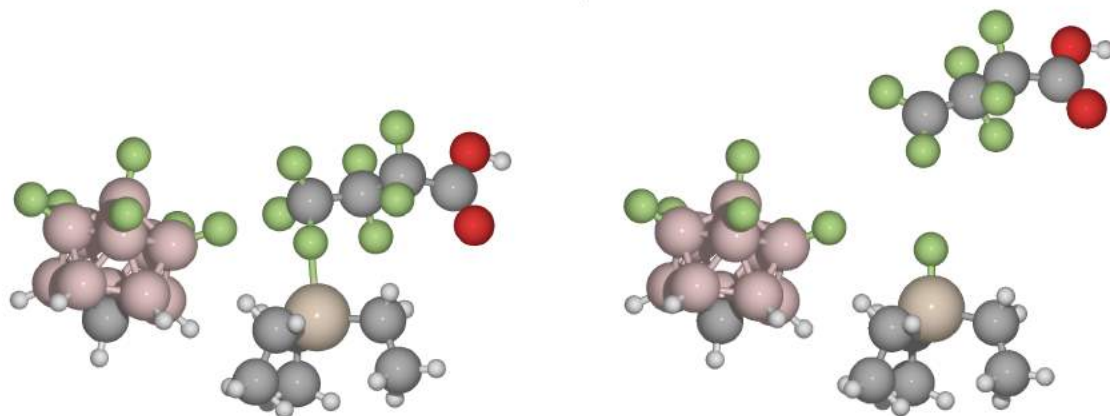

(c) C $\omega$

Figure S18: Initial and final states of carbocation formation/defluorination as a function of position for PFBA in the presence of a carborane anion ([HCB<sub>11</sub>H<sub>5</sub>F<sub>6</sub>]<sup>-</sup>).

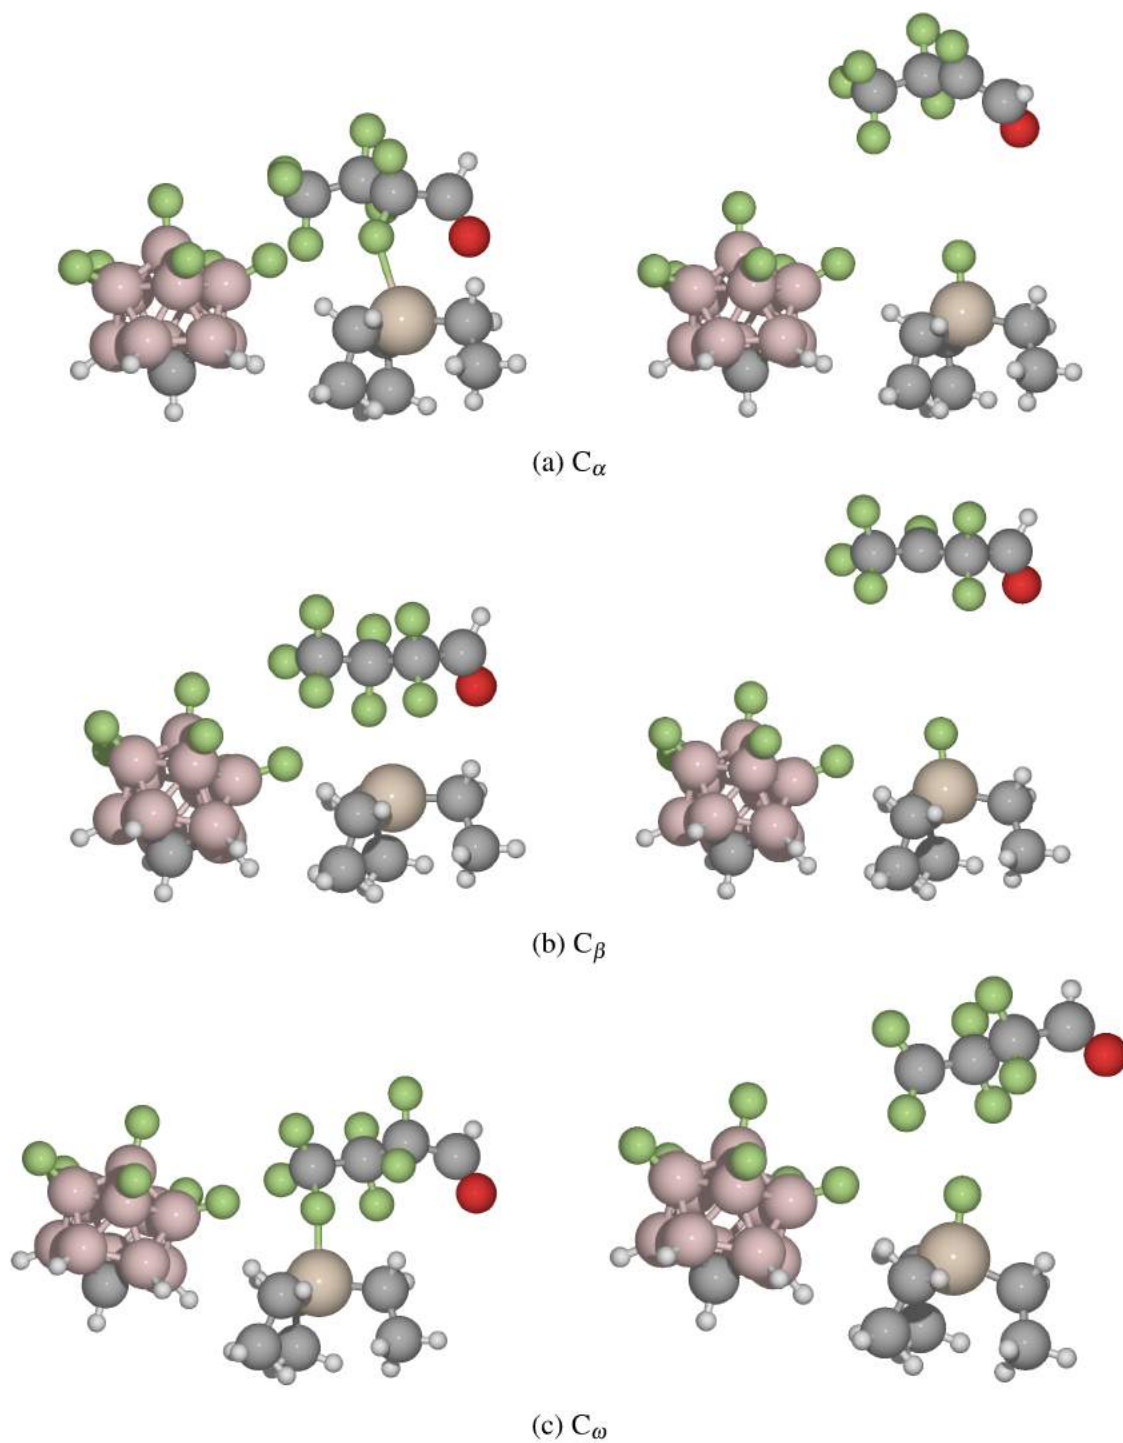

Figure S19: Initial and final states of carbocation formation/defluorination as a function of position for PFB in the presence of a carborane anion ( $[\text{HCB}_{11}\text{H}_5\text{F}_6]^-$ ).

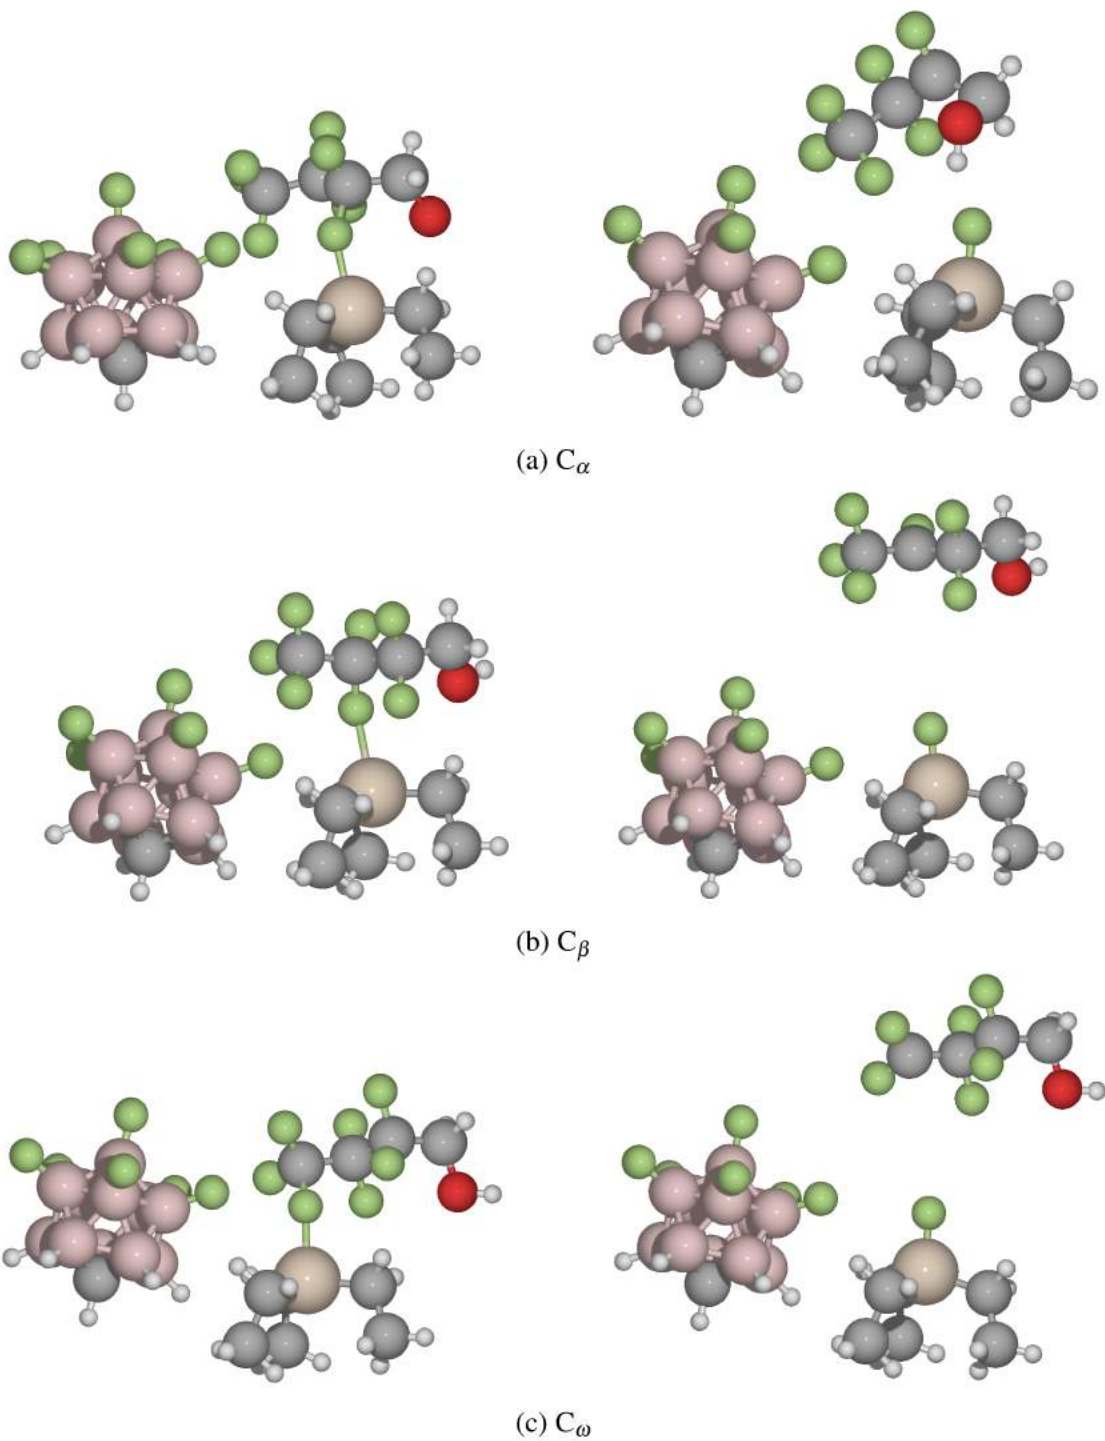

Figure S20: Initial and final states of carbocation formation/defluorination as a function of position for HFBO in the presence of a carborane anion ( $[HCB_{11}H_5F_6]^-$ ).

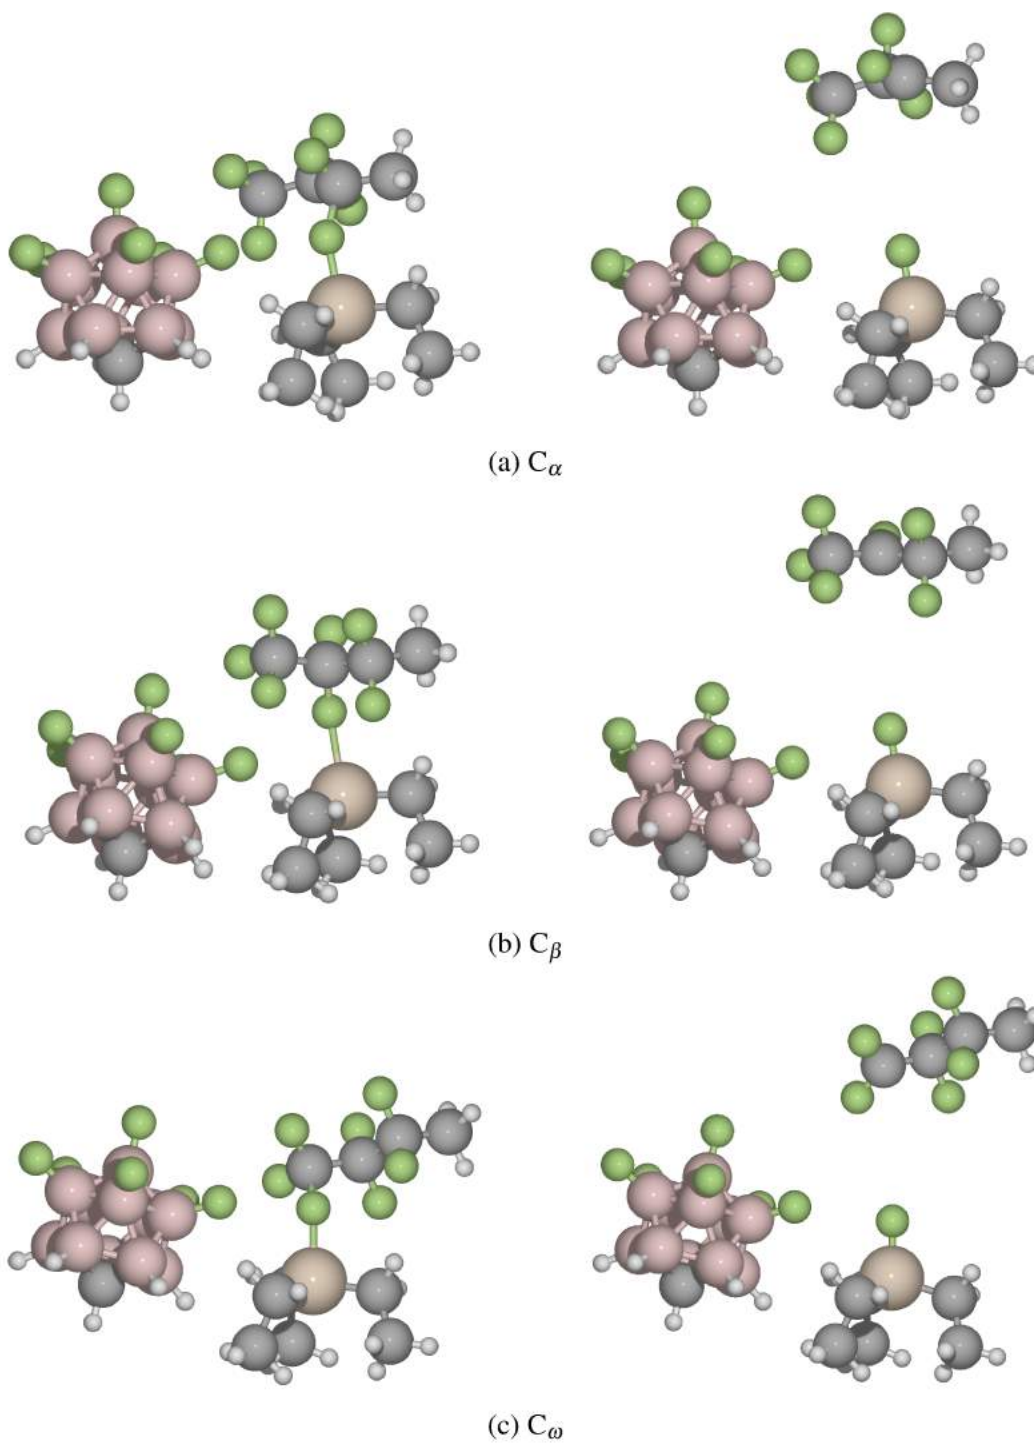

Figure S21: Initial and final states of carbocation formation/defluorination as a function of position for HFB in the presence of a carborane anion ( $[\text{HCB}_{11}\text{H}_5\text{F}_6]^-$ ).

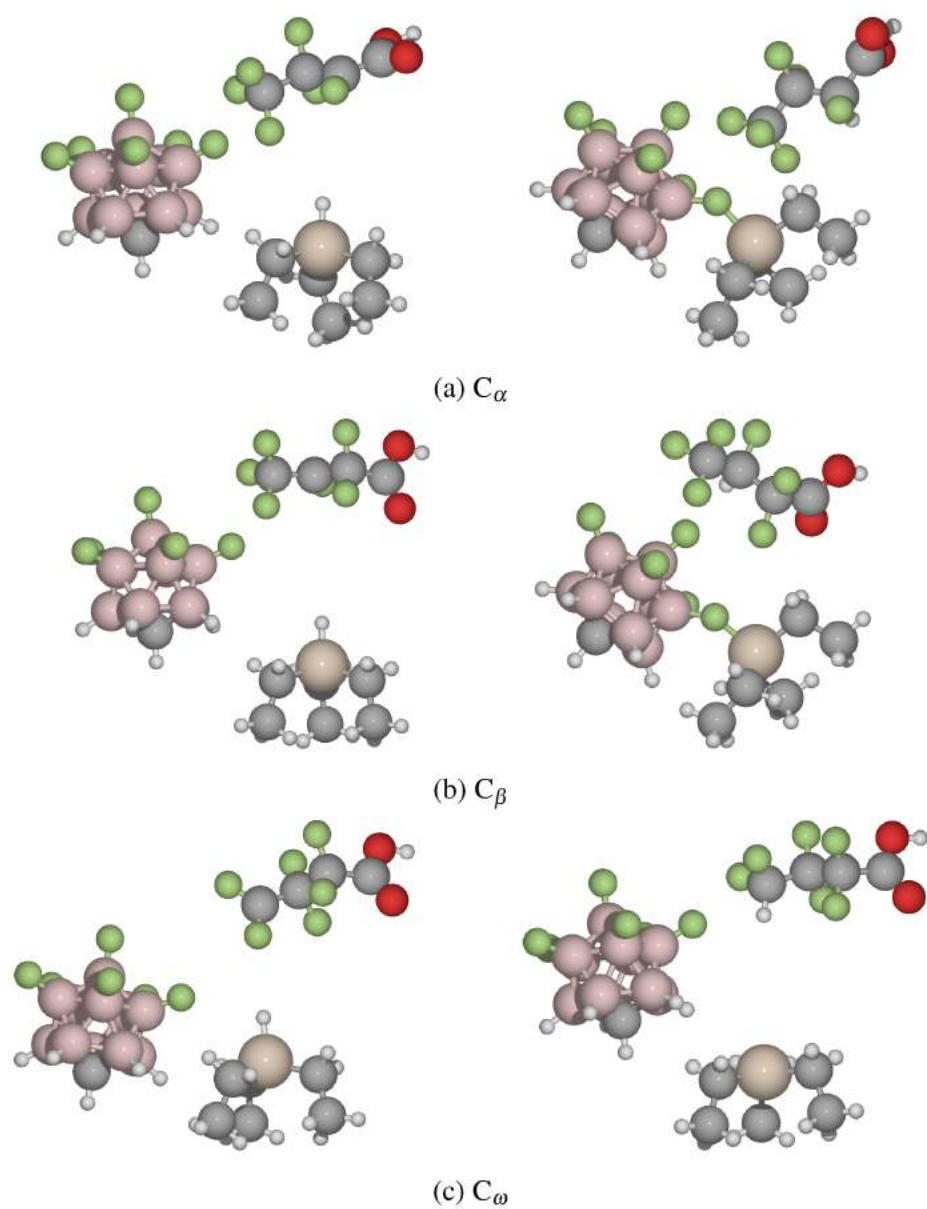

Figure S22: Initial and final states of the hydride addition reaction of the carbocation as a function of position for PFBA.

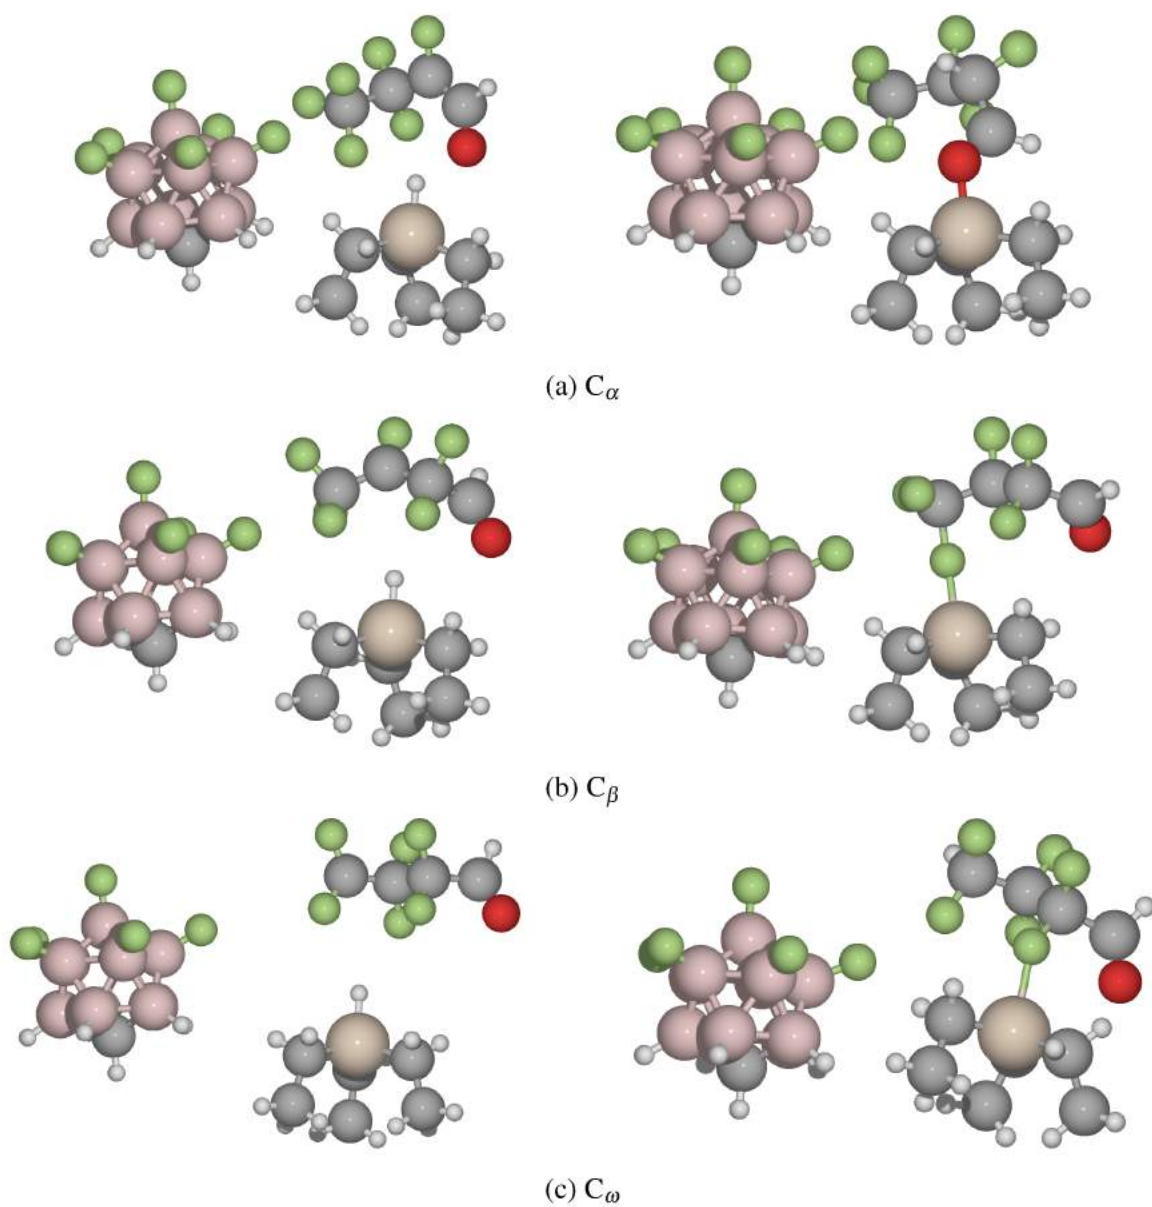

Figure S23: Initial and final states of the hydride addition reaction of the carbocation as a function of position for PFB.

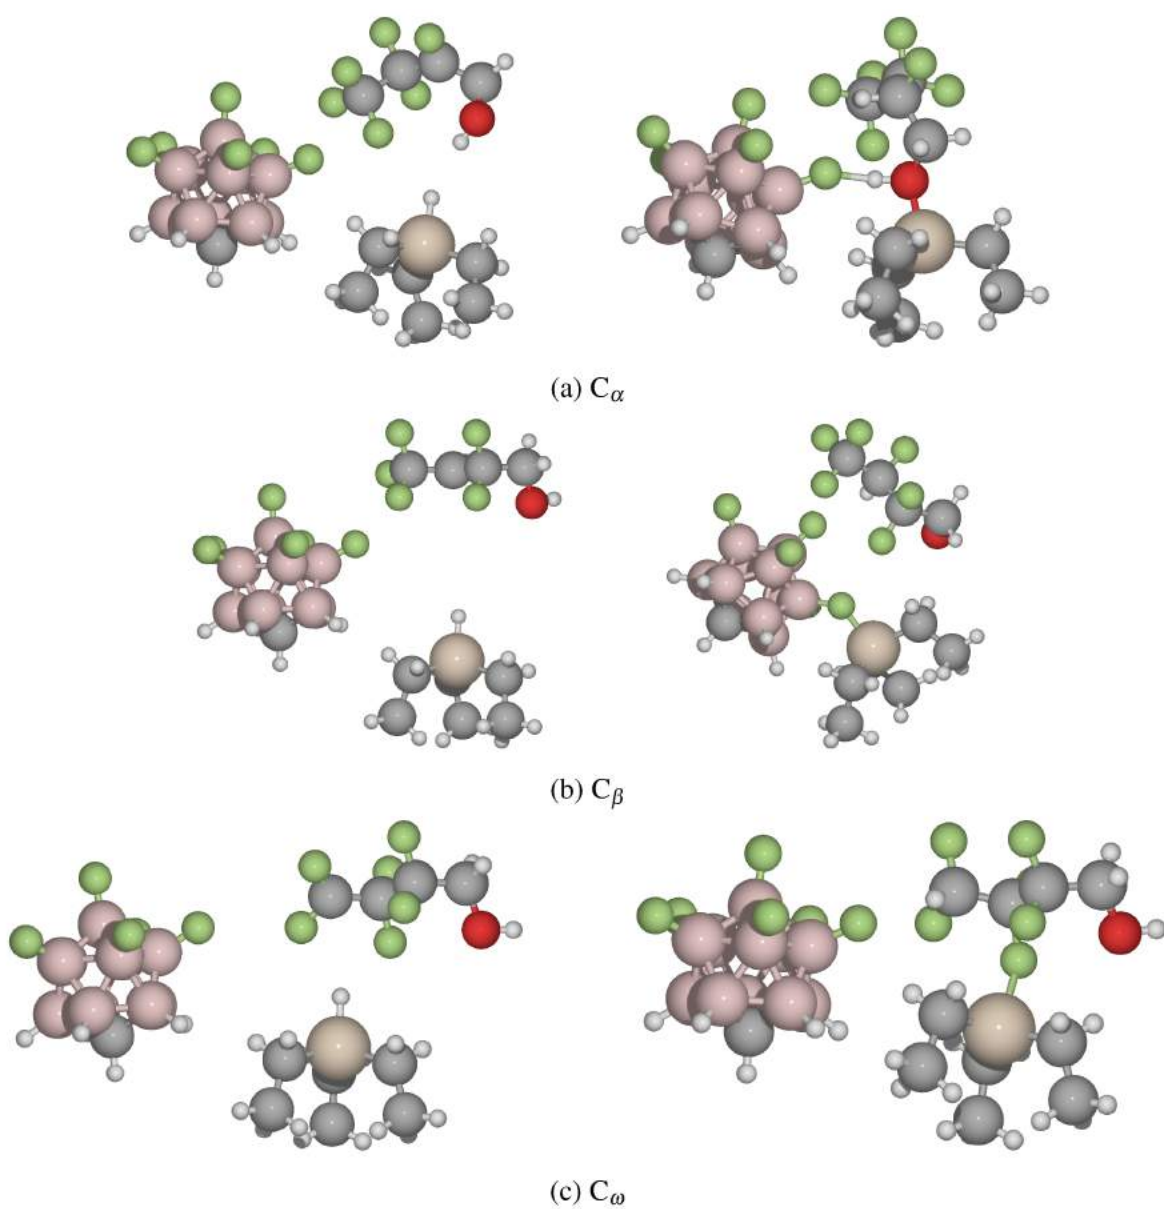

Figure S24: Initial and final states of the hydride addition reaction of the carbocation as a function of position for HFBO.

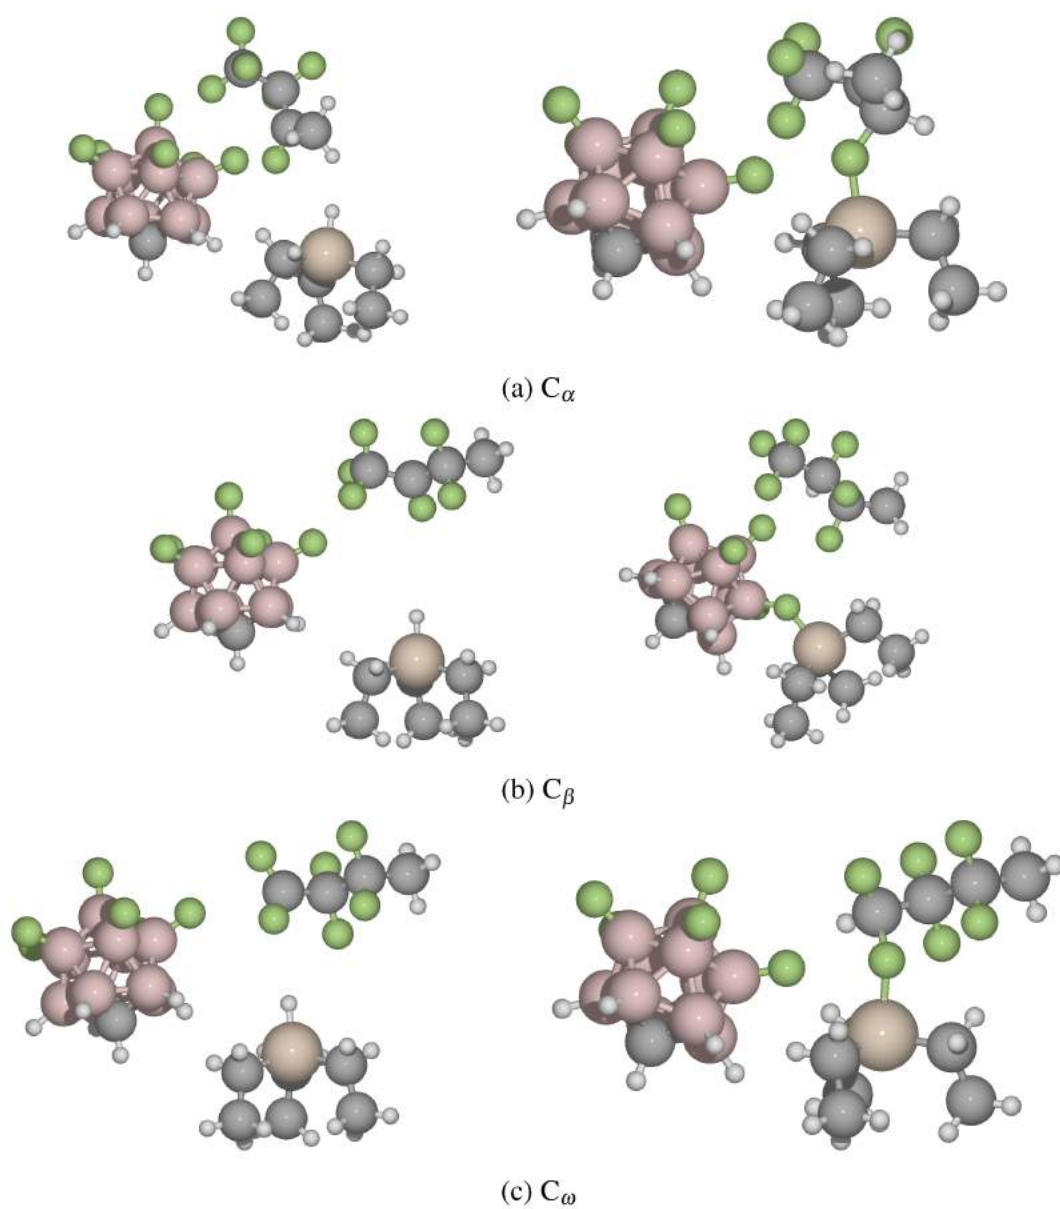

Figure S25: Initial and final states of the hydride addition reaction of the carbocation as a function of position for HFB.

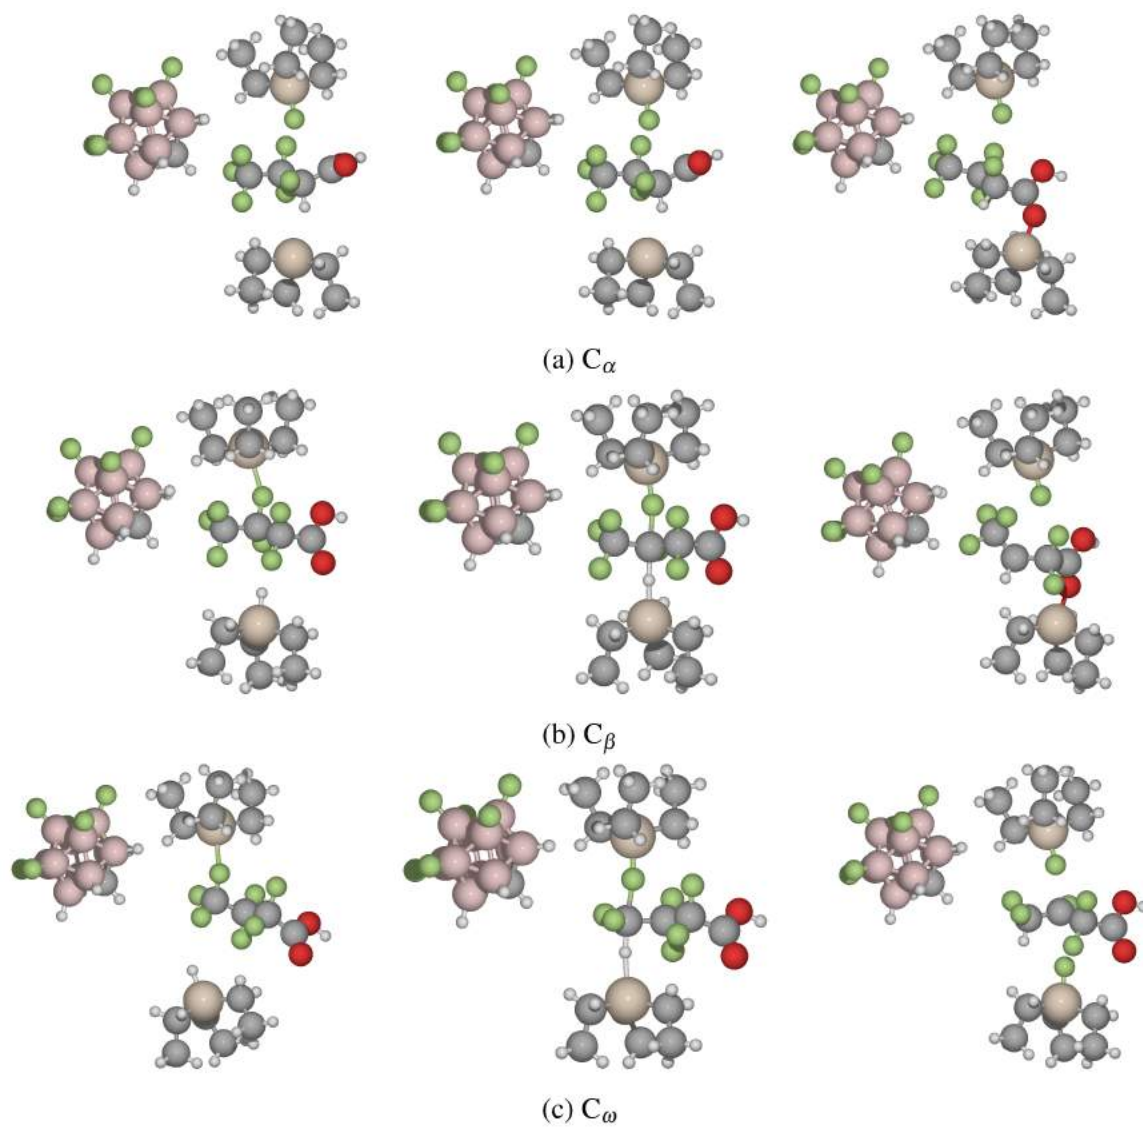

Figure S26: Initial, transition, and final states of the concerted defluorination/hydride addition reaction as a function of position for PFBA in the presence of a carborane anion ( $[HCB_{11}H_5F_6]^-$ ).

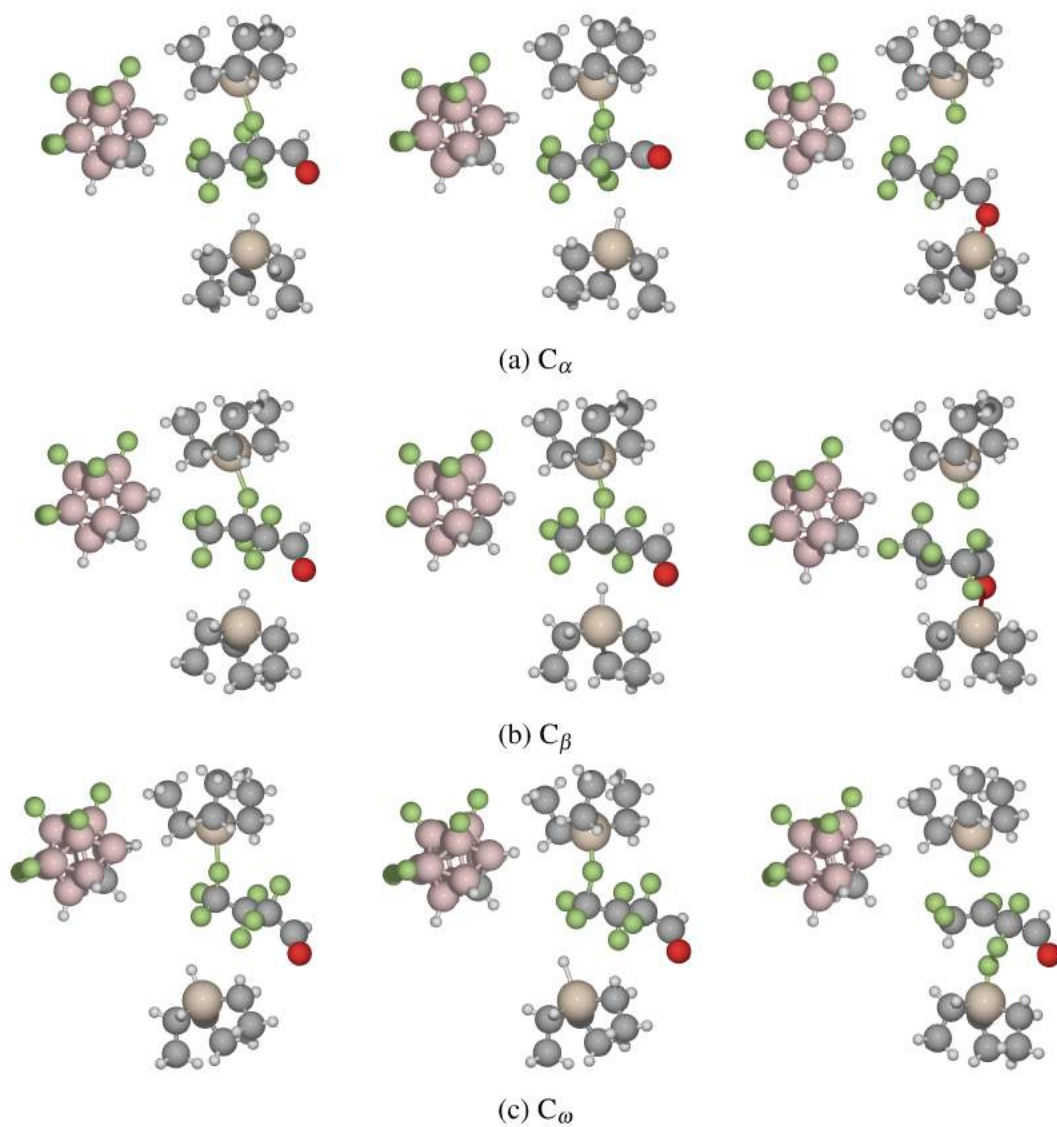

Figure S27: Initial, transition, and final states of the concerted defluorination/hydride addition reaction as a function of position for PFB in the presence of a carborane anion ( $[\text{HCB}_{11}\text{H}_5\text{F}_6]^-$ ).

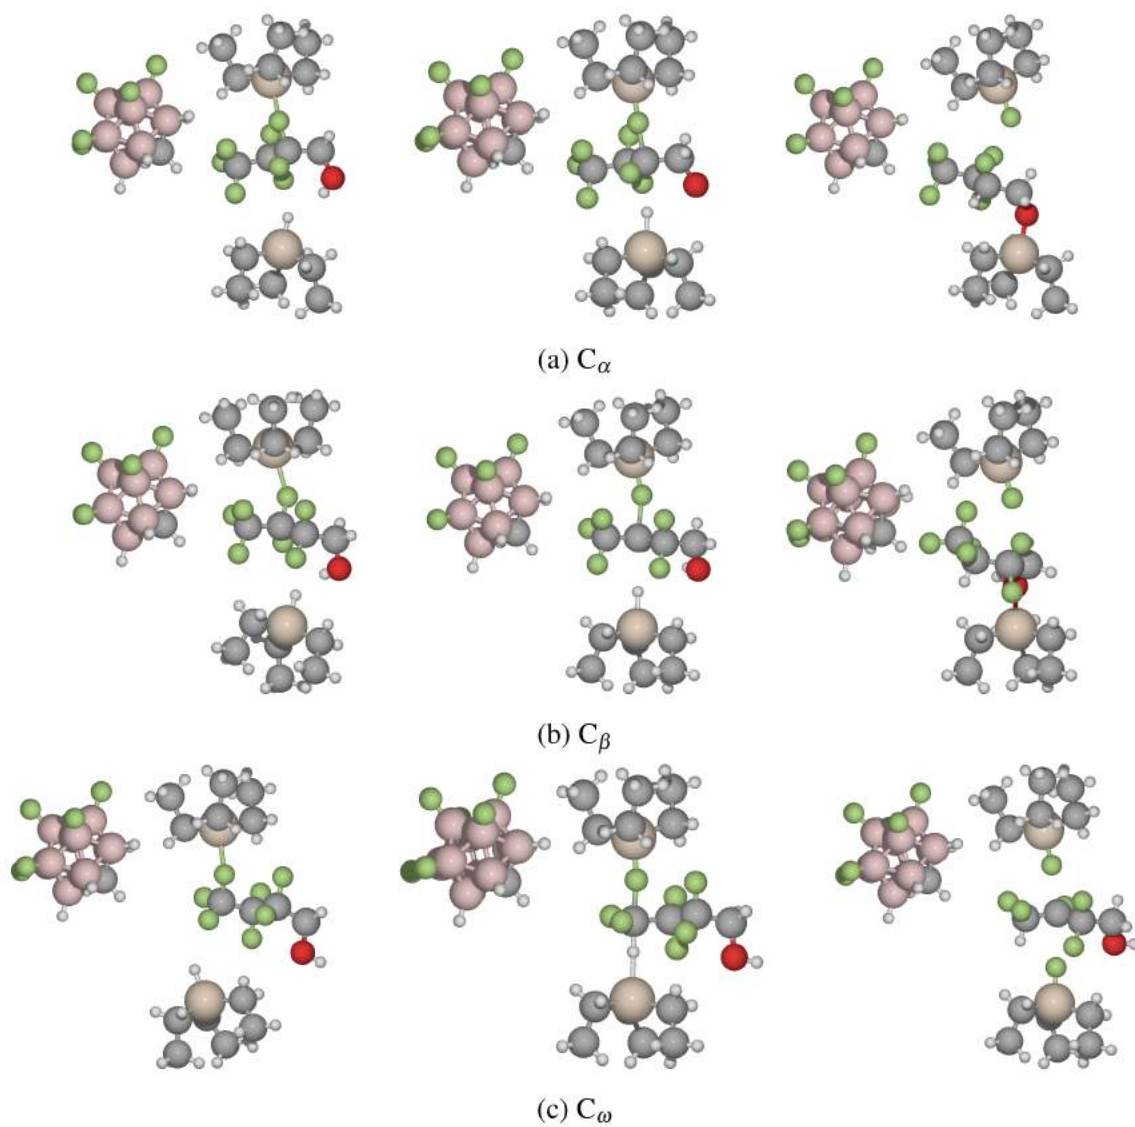

Figure S28: Initial, transition, and final states of the concerted defluorination/hydride addition reaction as a function of position for HFBO in the presence of a carborane anion ( $[HCB_{11}H_5F_6]^-$ ).

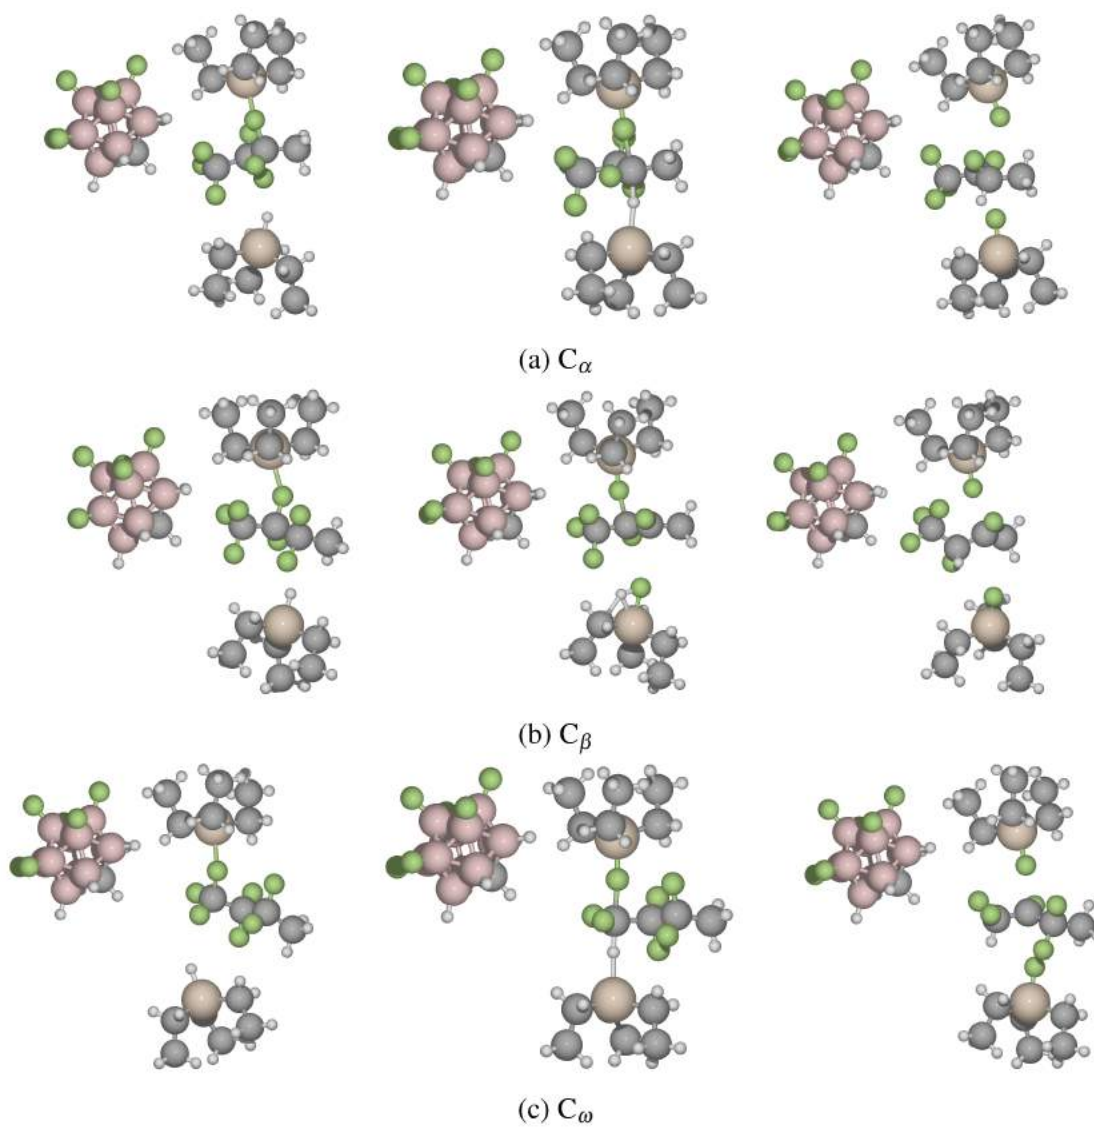

Figure S29: Initial, transition, and final states of the concerted defluorination/hydride addition reaction as a function of position for HFB in the presence of a carborane anion ( $[\text{HCB}_{11}\text{H}_5\text{F}_6]^-$ ).

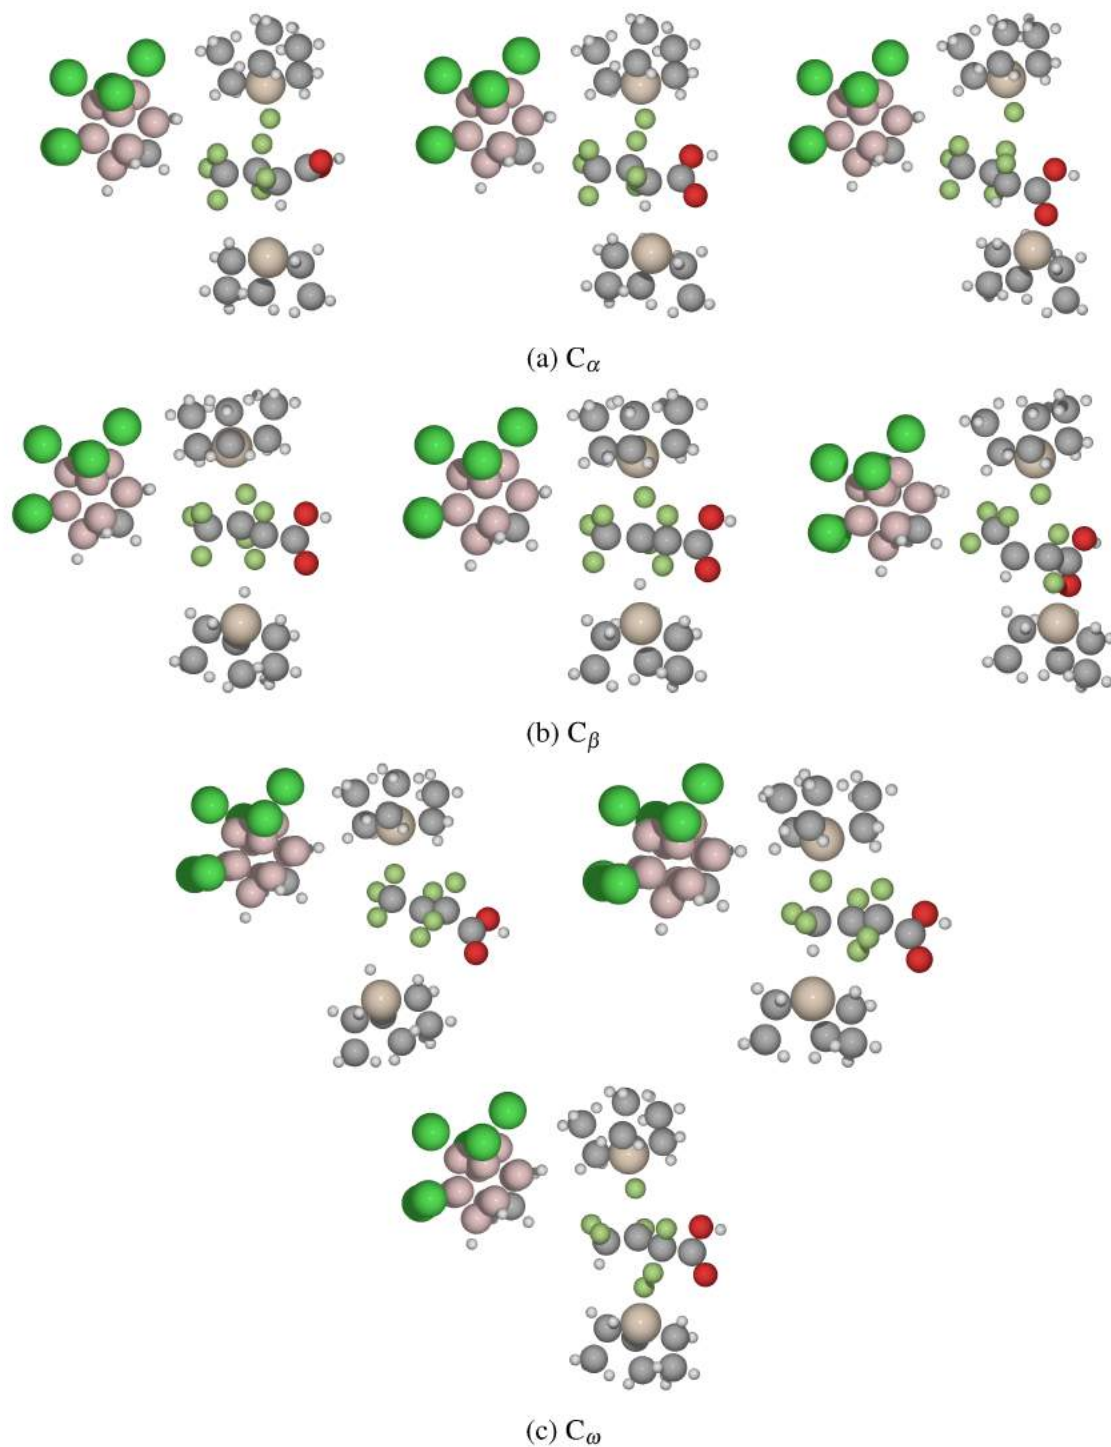

Figure S30: Initial, transition, and final states of the concerted defluorination/hydride addition reaction as a function of position for PFBA in the presence of a carborane anion ( $[\text{HCB}_{11}\text{H}_5\text{Cl}_6]^-$ ).

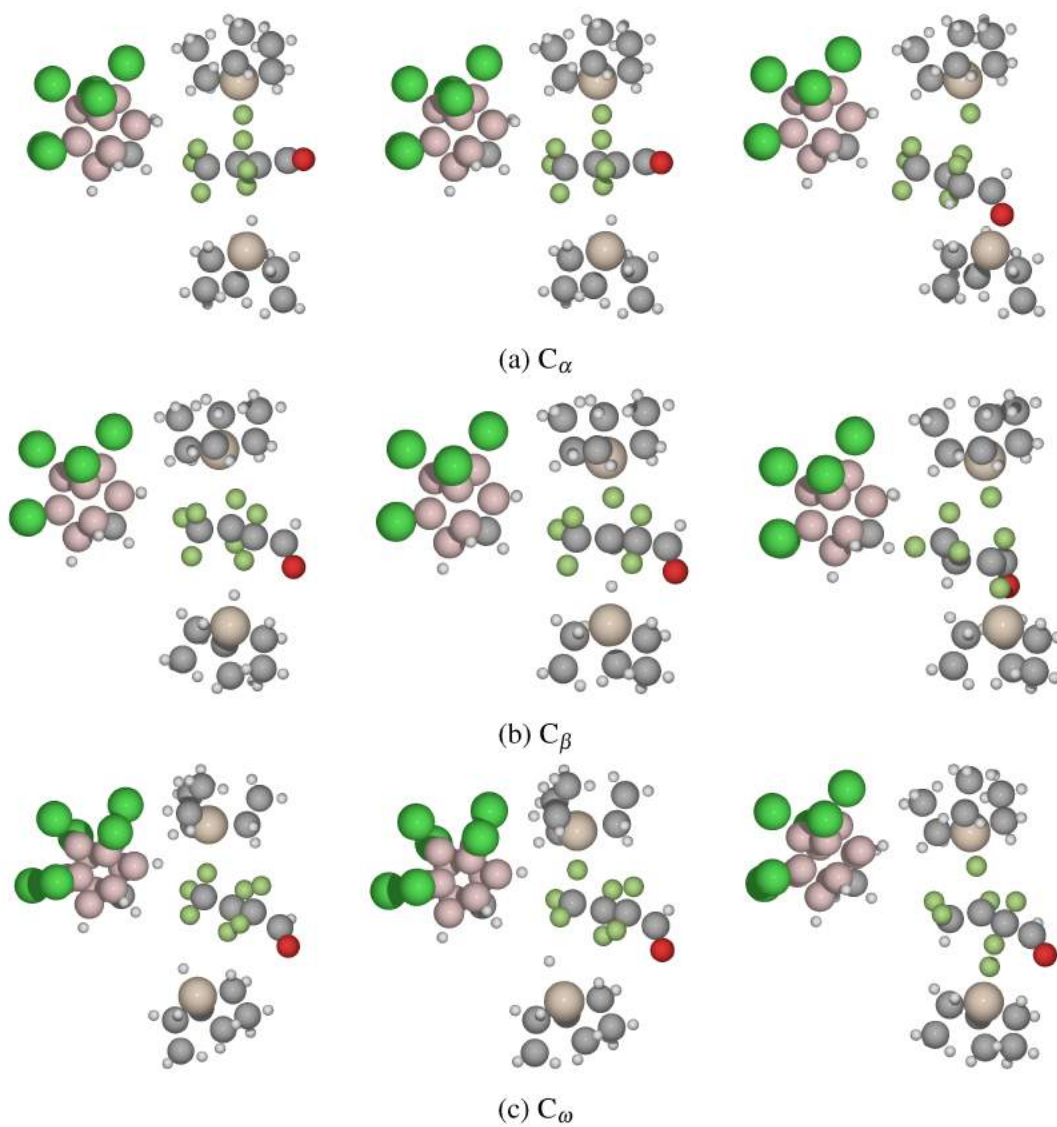

Figure S31: Initial, transition, and final states of the concerted defluorination/hydride addition reaction as a function of position for PFB in the presence of a carborane anion ( $[\text{HCB}_{11}\text{H}_5\text{Cl}_6]^-$ ).

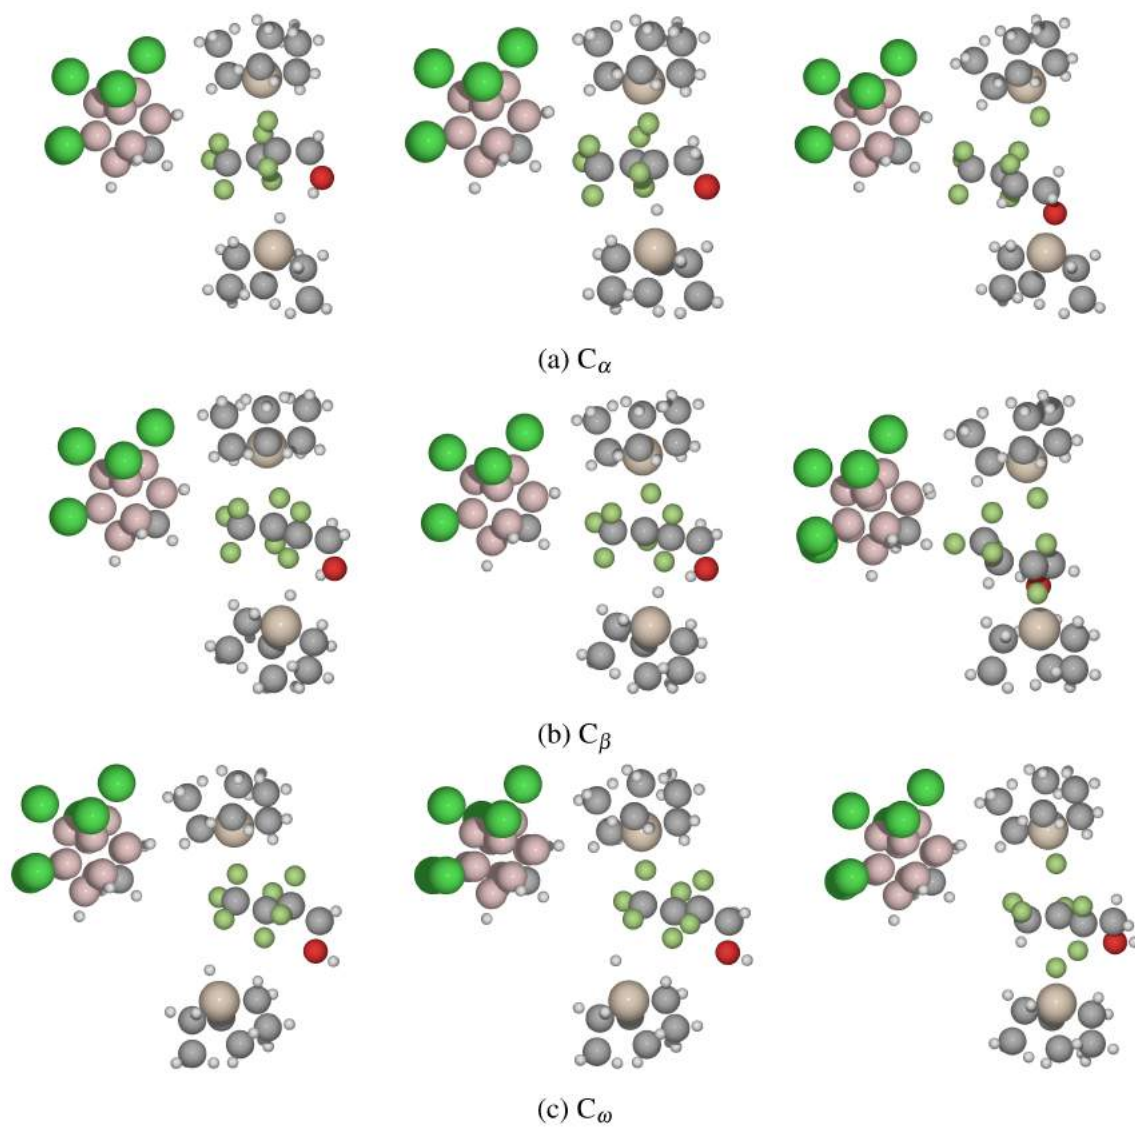

Figure S32: Initial, transition, and final states of the concerted defluorination/hydride addition reaction as a function of position for HFBO in the presence of a carborane anion ( $[\text{HCB}_{11}\text{H}_5\text{Cl}_6]^-$ ).

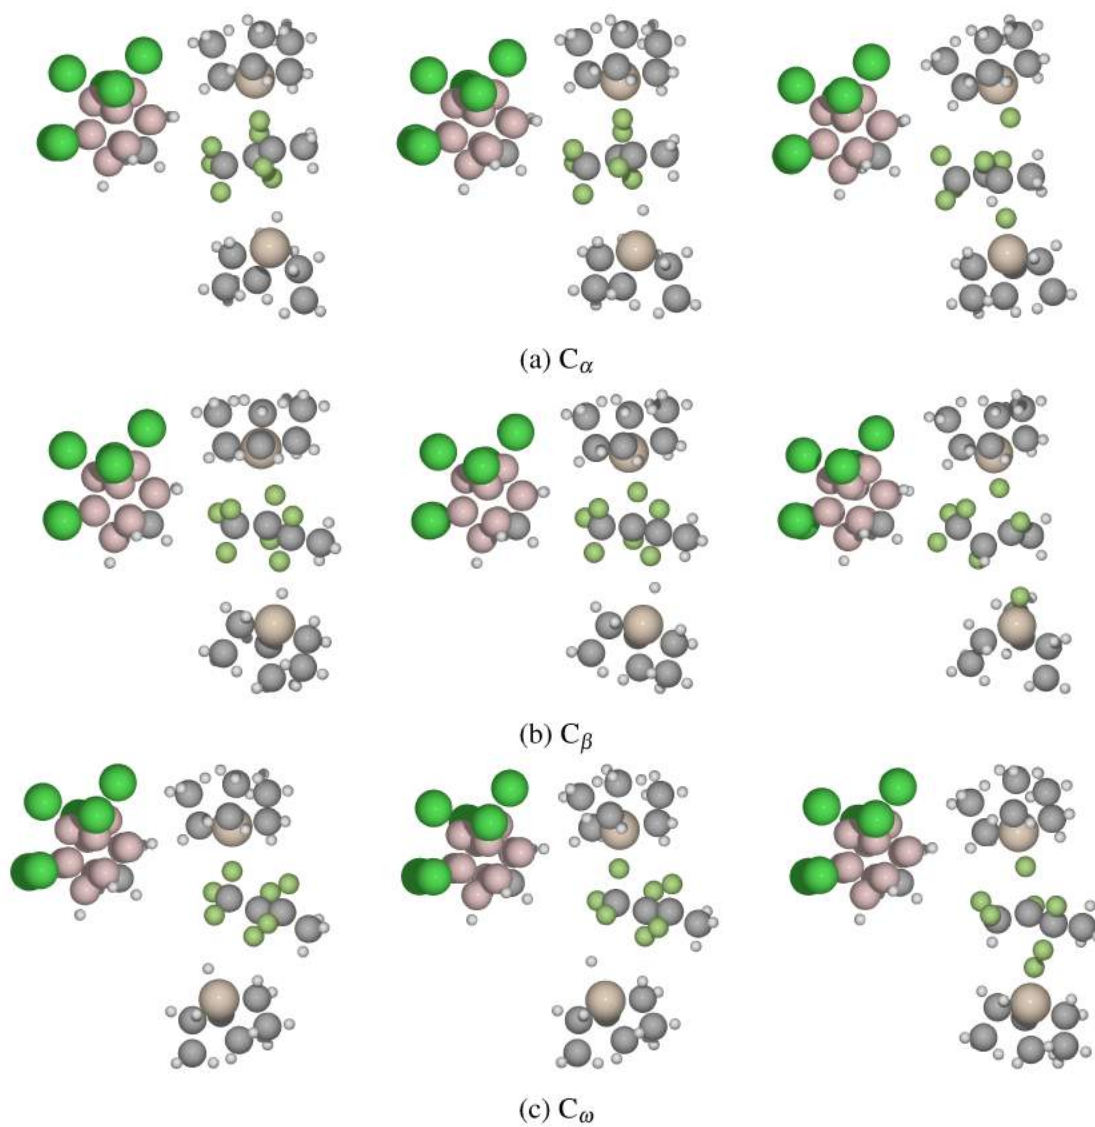

Figure S33: Initial, transition, and final states of the concerted defluorination/hydride addition reaction as a function of position for HFB in the presence of a carborane anion ( $[\text{HCB}_{11}\text{H}_5\text{Cl}_6]^-$ ).

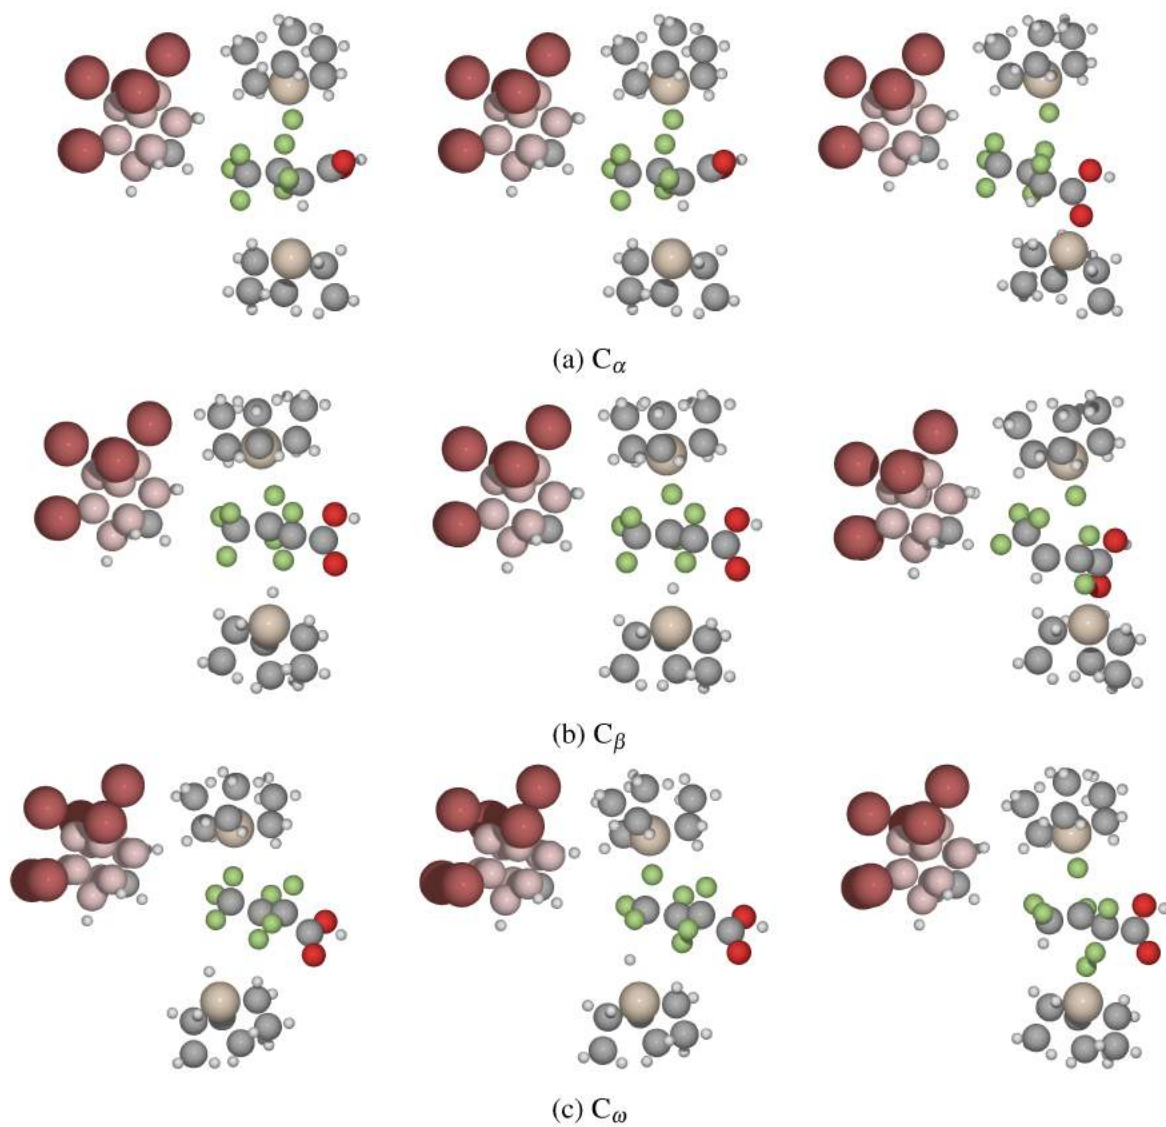

Figure S34: Initial, transition, and final states of the concerted defluorination/hydride addition reaction as a function of position for PFBA in the presence of a carborane anion ( $[\text{HCB}_{11}\text{H}_5\text{Br}_6]^-$ ).

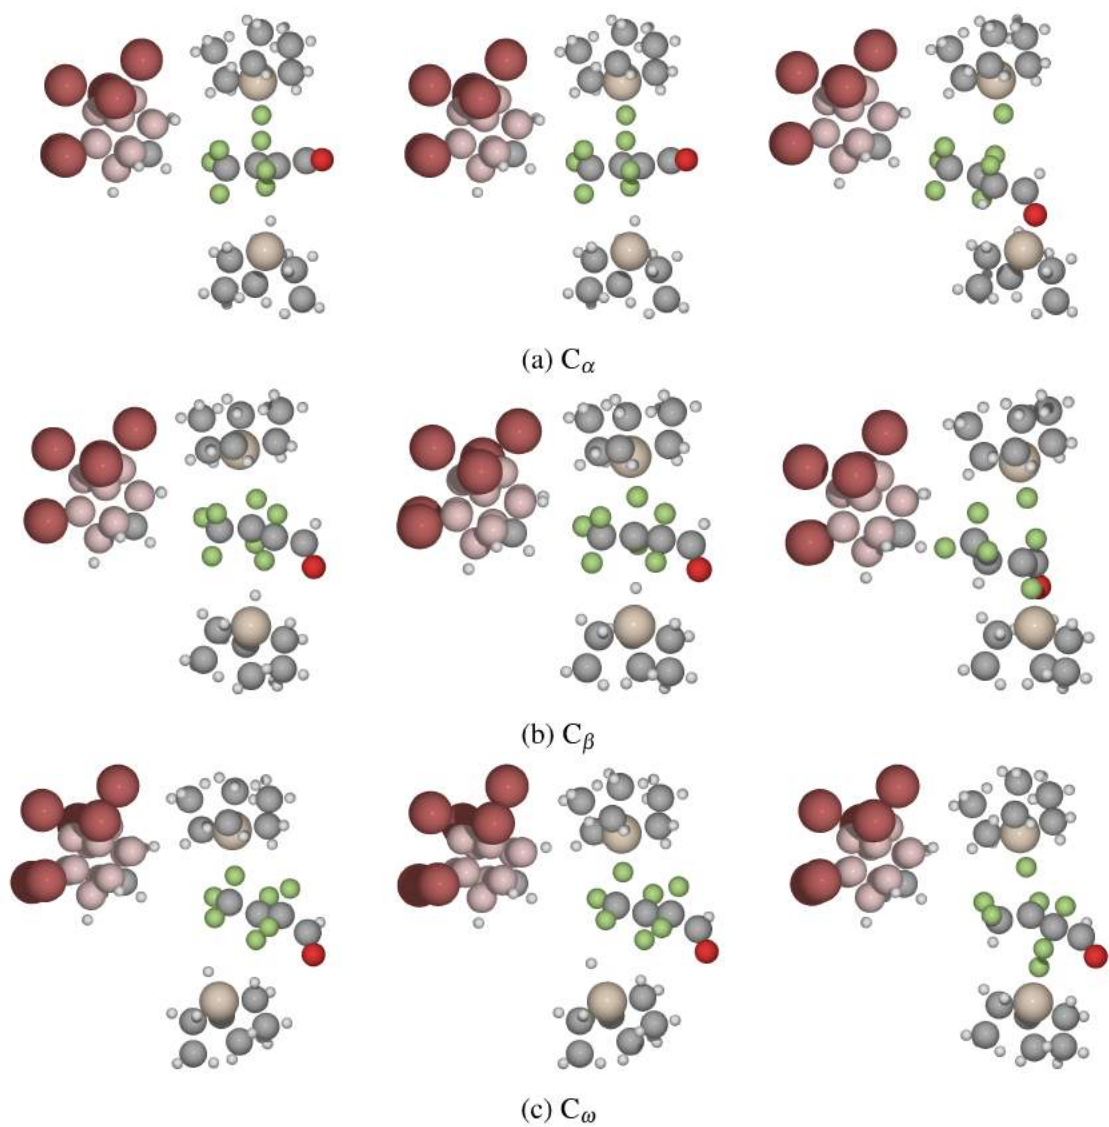

Figure S35: Initial, transition, and final states of the concerted defluorination/hydride addition reaction as a function of position for PFB in the presence of a carborane anion ( $[\text{HCB}_{11}\text{H}_5\text{Br}_6]^-$ ).

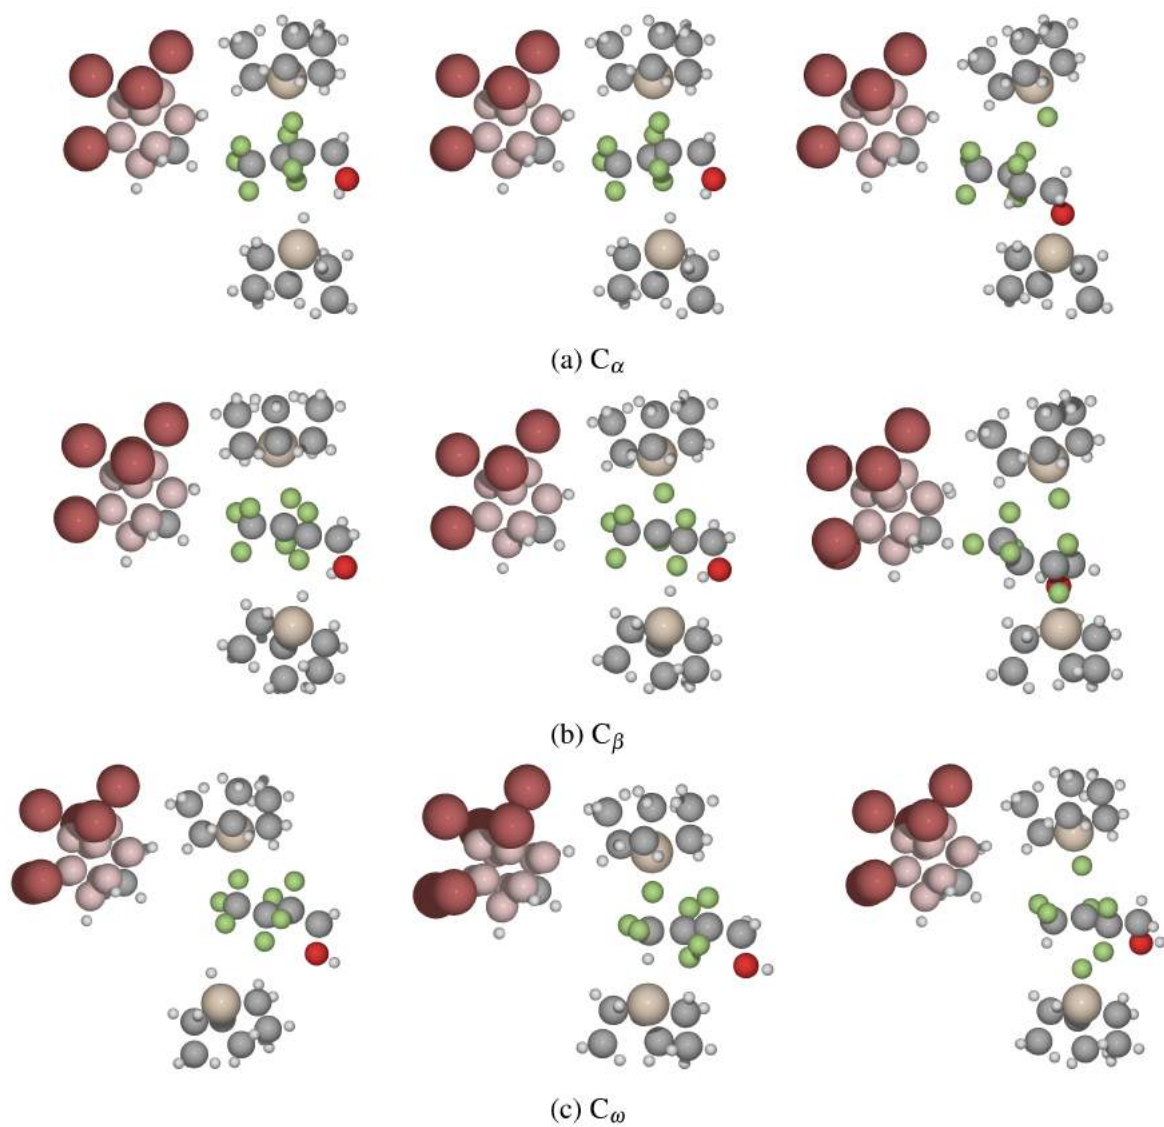

Figure S36: Initial, transition, and final states of the concerted defluorination/hydride addition reaction as a function of position for HFBO in the presence of a carborane anion ( $[\text{HCB}_{11}\text{H}_5\text{Br}_6]^-$ ).

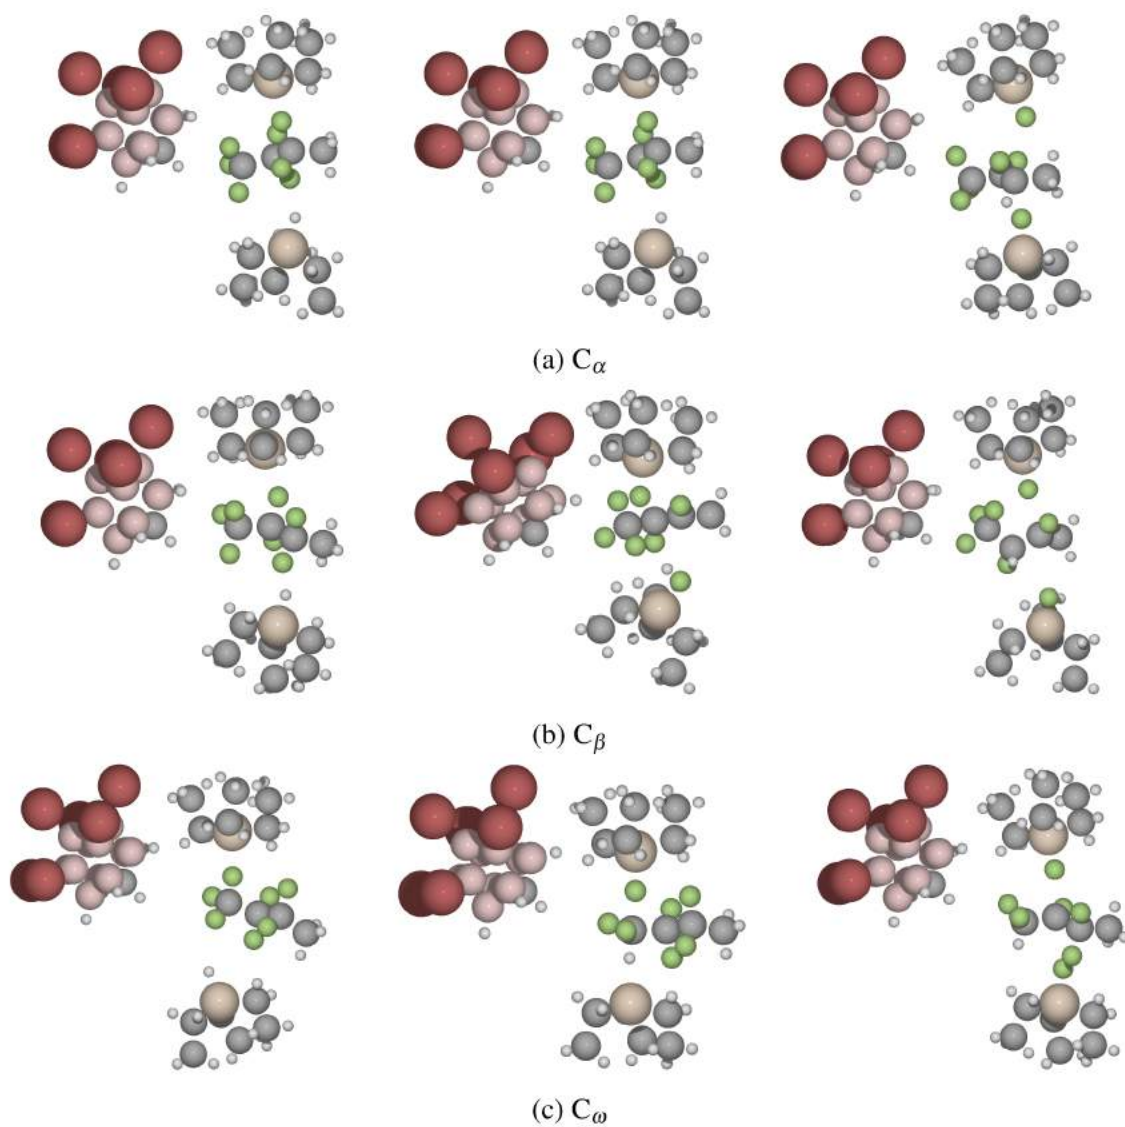

Figure S37: Initial, transition, and final states of the concerted defluorination/hydride addition reaction as a function of position for HFB in the presence of a carborane anion ( $[\text{HCB}_{11}\text{H}_5\text{Br}_6]^-$ ).

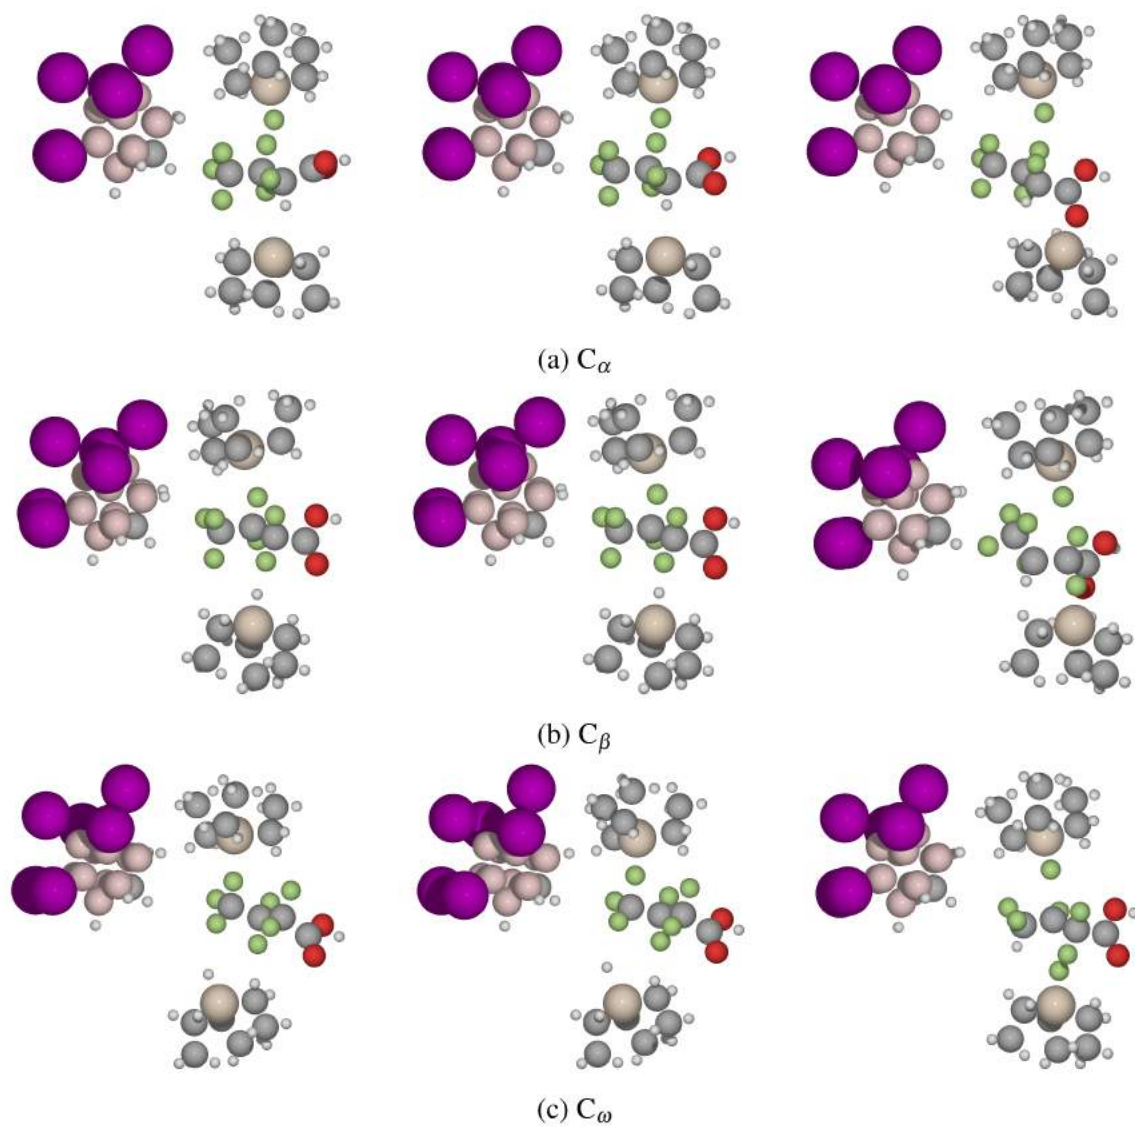

Figure S38: Initial, transition, and final states of the concerted defluorination/hydride addition reaction as a function of position for PFBA in the presence of a carborane anion ( $[\text{HCB}_{11}\text{H}_5\text{I}_6]^-$ ).

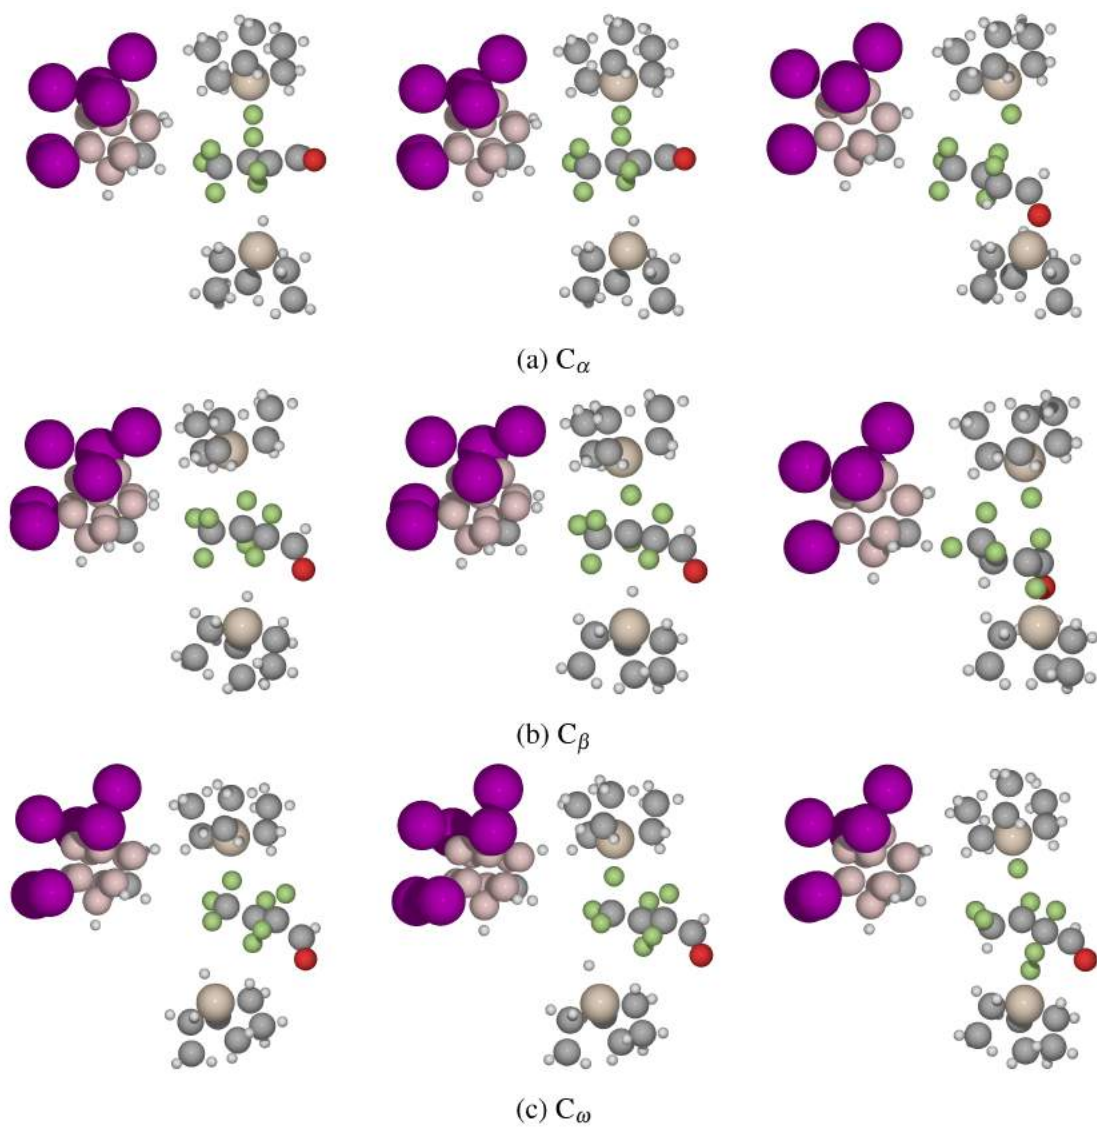

Figure S39: Initial, transition, and final states of the concerted defluorination/hydride addition reaction as a function of position for PFB in the presence of a carborane anion ( $[\text{HCB}_{11}\text{H}_5\text{I}_6]^-$ ).

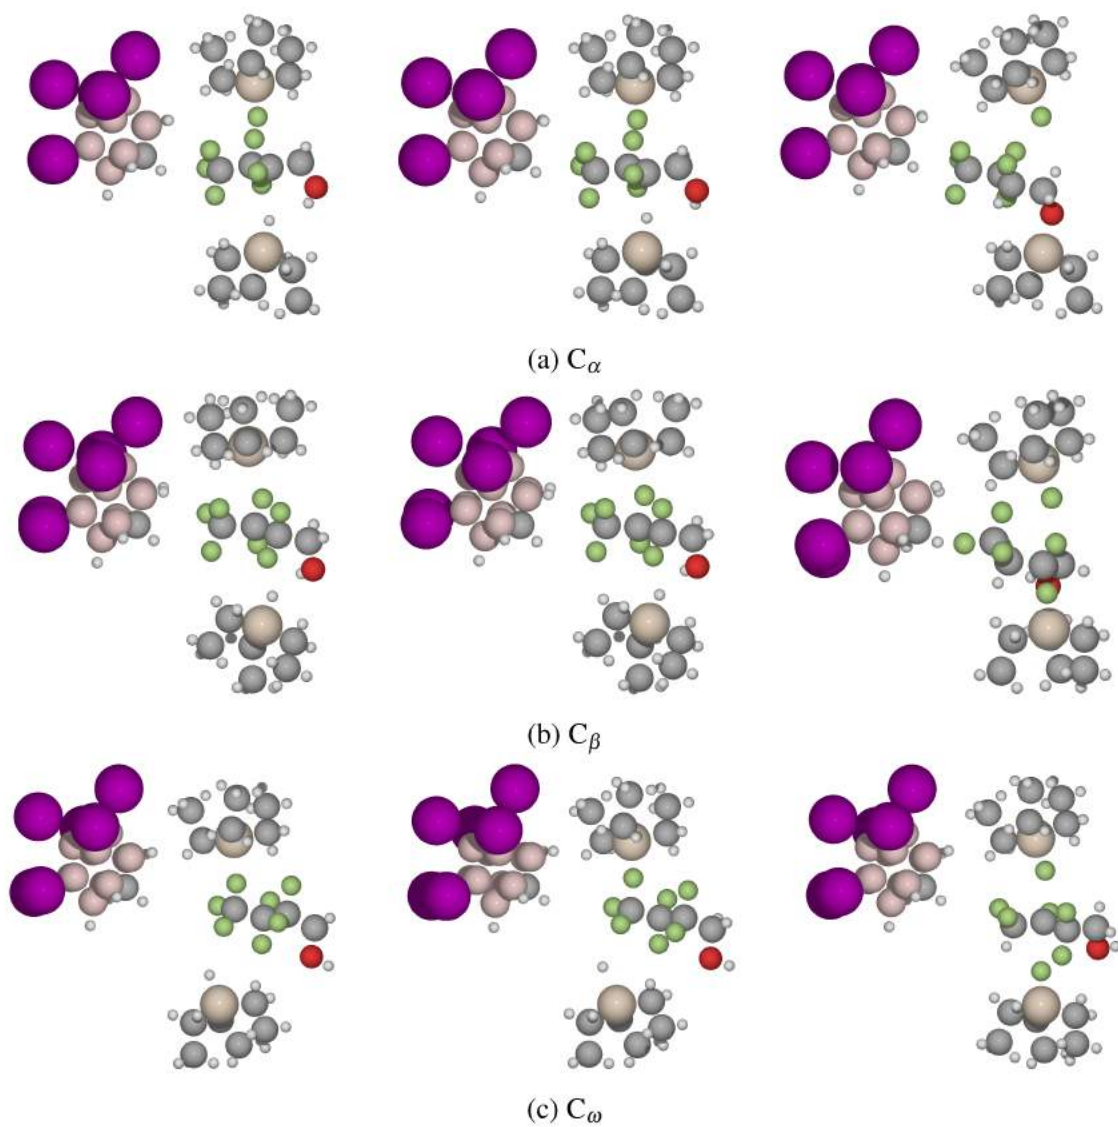

Figure S40: Initial, transition, and final states of the concerted defluorination/hydride addition reaction as a function of position for HFBO in the presence of a carborane anion ( $[\text{HCB}_{11}\text{H}_5\text{I}_6]^-$ ).

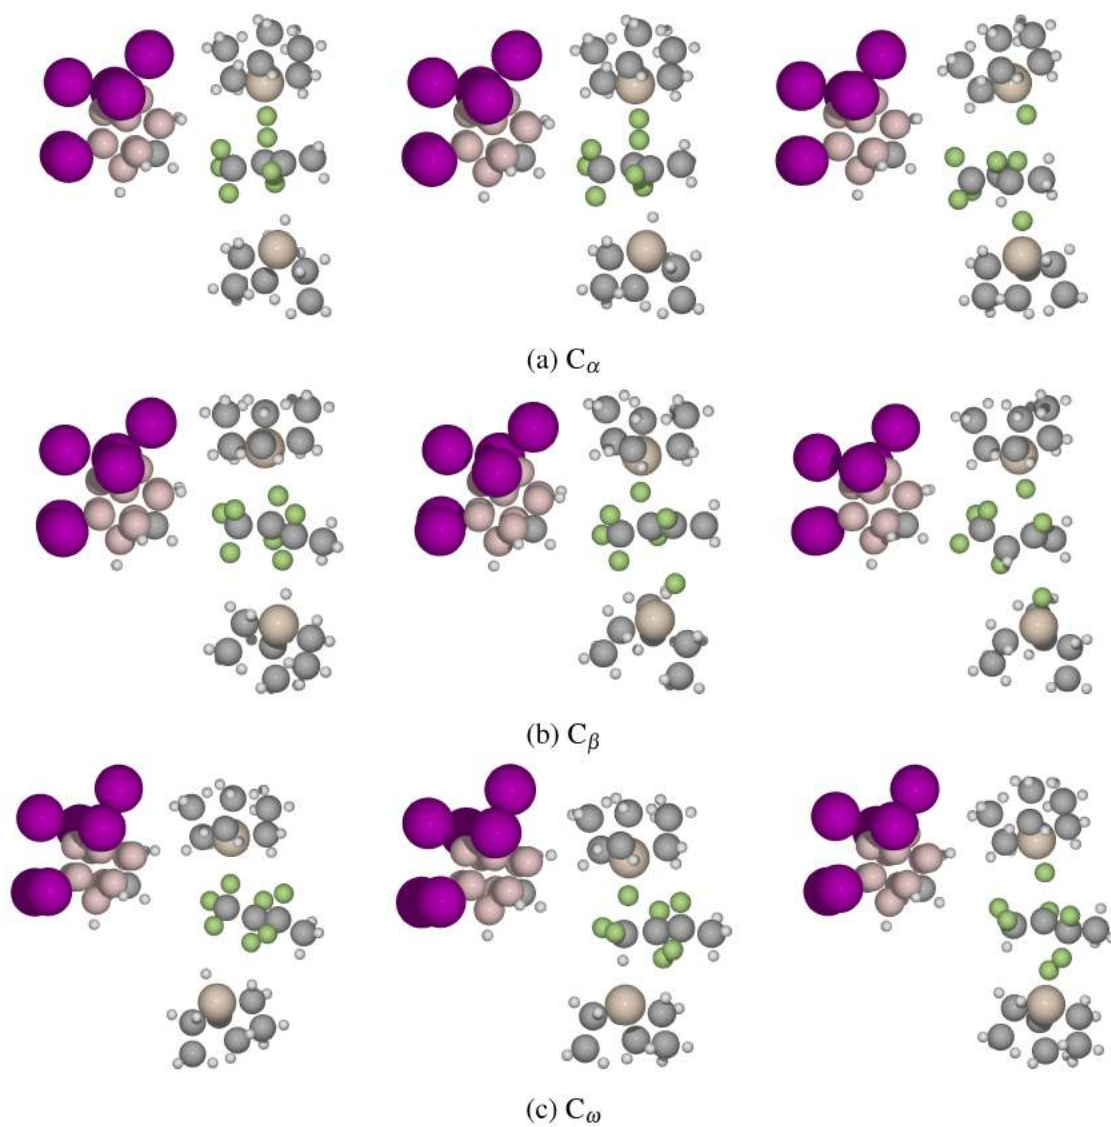

Figure S41: Initial, transition, and final states of the concerted defluorination/hydride addition reaction as a function of position for HFB in the presence of a carborane anion ( $[HCB_{11}H_5I_6]^-$ ).

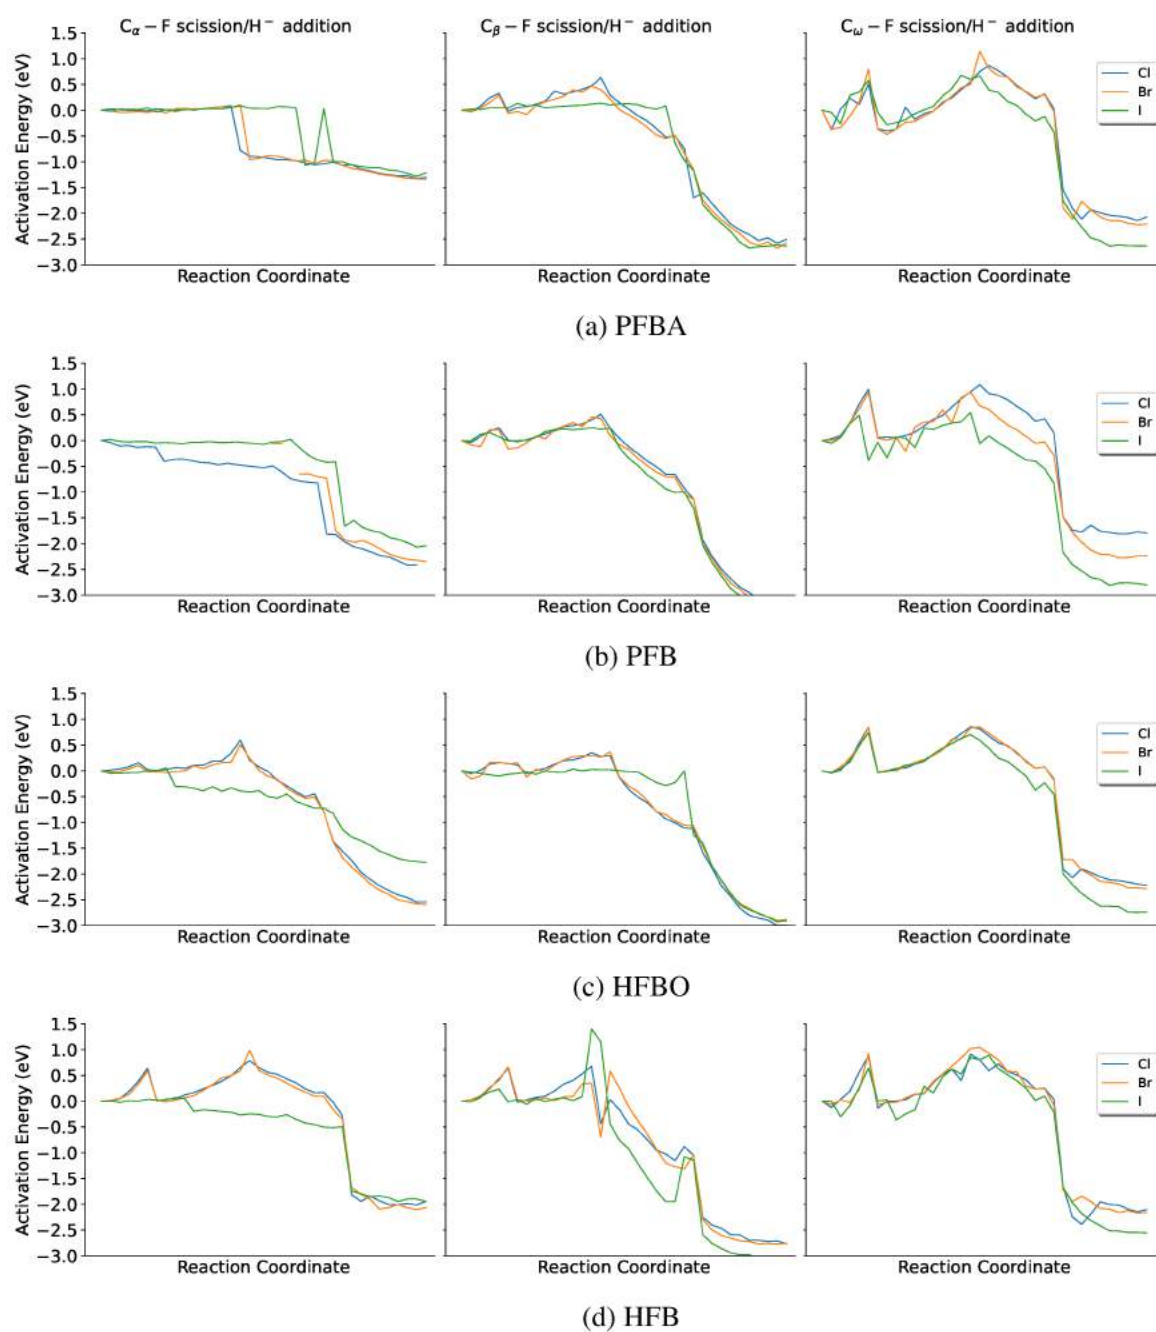

Figure S42: Reaction pathways for the four per-fluorinated molecules in the current study as a function of carbon position and in the presence of carborane  $[\text{HCB}_{11}\text{H}_5\text{X}_6]^-$  where  $\text{X} = \{\text{Cl}, \text{Br}, \text{I}\}$ .

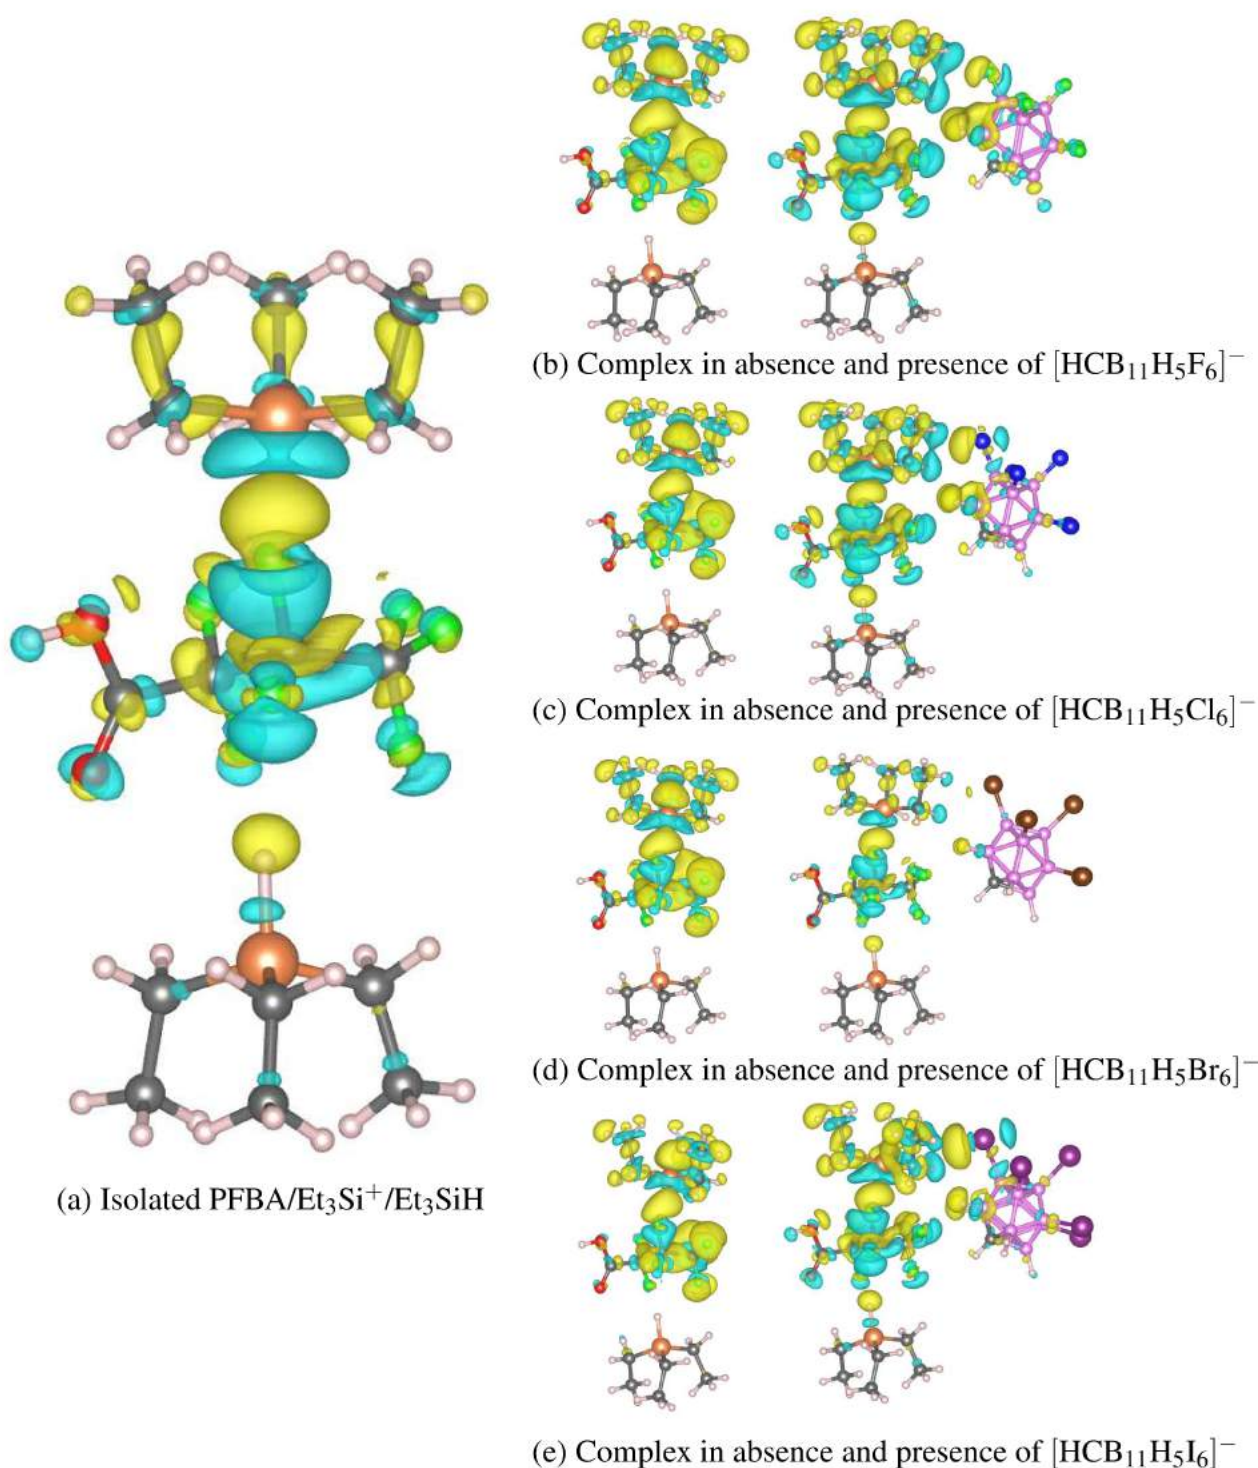

Figure S43: PFBA charge differences across different carboranes. Isosurfaces without the carborane are at  $0.01 e^- \text{ \AA}^{-3}$  and those with carborane are at  $0.005 e^- \text{ \AA}^{-3}$ . The difference in isosurfaces is due to clarity; charge differences without the carborane showed little change between  $0.01 e^- \text{ \AA}^{-3}$  and  $0.005 e^- \text{ \AA}^{-3}$ . Blue regions denote areas of charge depletion, whilst yellow denotes areas of charge accumulation.
